# Supplementary material for: Examining the relationships between psychological distress and financial hardship and uncertainty during the COVID-19 pandemic and the subsequent cost-of-living crisis in the United Kingdom
Source: bioRxiv or medRxiv preprint supplement (doi:10.1101/2024.01.14.24301283), 2024-04-12
Supplement: Supplementary file [file media-1.pdf]

# Supplementary files

|                                                                                                                                                                             |    |
|-----------------------------------------------------------------------------------------------------------------------------------------------------------------------------|----|
| <i>Supplementary file S.1. Data collection periods, waves and selected cohorts</i> .....                                                                                    | 2  |
| <i>Supplementary file S2. Attrition pattern in cohort 1</i> .....                                                                                                           | 3  |
| <i>Supplementary file S.3. Attrition pattern in cohort 2</i> .....                                                                                                          | 4  |
| <i>Supplementary file S.4. GHQ-36, density plots and cross-sectional change</i> .....                                                                                       | 5  |
| Figure S.4.1. GHQ-36 density plot by year in cohort 1 (including cross-sectional and inverse probability weights) .....                                                     | 5  |
| Figure S.4.2. GHQ-36 density plot by year in cohort 2 (including cross-sectional and inverse probability weights) .....                                                     | 6  |
| Figure S.4.3. Percentages of GHQ caseness based on GHQ-36 by year), financial uncertainty, financial hardship and consumer price inflation (z-axis) from 1991 to 2022 ..... | 7  |
| <i>Supplementary file S.5. LGM results for cohort 1 (2016-2019)</i> .....                                                                                                   | 8  |
| Financial hardship (cross-sectional baseline weight) .....                                                                                                                  | 8  |
| Financial hardship (cross-sectional baseline weight and ipw for attrition) .....                                                                                            | 9  |
| Financial uncertainty (cross-sectional baseline weight).....                                                                                                                | 10 |
| Financial uncertainty (cross-sectional baseline weight and ipw for attrition) .....                                                                                         | 11 |
| Financial hardship and uncertainty (cross-sectional baseline).....                                                                                                          | 13 |
| Financial hardship and uncertainty (cross-sectional baseline and ipw for attrition) .....                                                                                   | 14 |
| <i>Supplementary file S.6. LGM results for cohort 2 (2019-2022)</i> .....                                                                                                   | 16 |
| Financial hardship (cross-sectional baseline weight) .....                                                                                                                  | 16 |
| Financial hardship (cross-sectional baseline weight and ipw for attrition) .....                                                                                            | 17 |
| Financial uncertainty (cross-sectional baseline weight).....                                                                                                                | 18 |
| Financial uncertainty (cross-sectional baseline weight and ipw for attrition) .....                                                                                         | 20 |
| Financial hardship and uncertainty (cross-sectional baseline).....                                                                                                          | 22 |
| Financial hardship and uncertainty (cross-sectional baseline and ipw for attrition) .....                                                                                   | 24 |

## Supplementary file S.1. Data collection periods, waves and selected cohorts

|                 |                     |                     |                     |                     |                     |                     |                     |
|-----------------|---------------------|---------------------|---------------------|---------------------|---------------------|---------------------|---------------------|
| Data collection | Jan 2015 - May 2017 |                     |                     |                     |                     |                     |                     |
|                 |                     | Jan 2016 - May 2018 |                     |                     |                     |                     |                     |
|                 |                     |                     | Jan 2017 - May 2019 |                     |                     |                     |                     |
|                 |                     |                     |                     | Jan 2018 - May 2020 |                     |                     |                     |
|                 |                     |                     |                     |                     | Jan 2019 - May 2021 |                     |                     |
|                 |                     |                     |                     |                     |                     | Jan 2020 - May 2022 |                     |
|                 |                     |                     |                     |                     |                     |                     | Jan 2021 - May 2023 |
| Waves           | <b>Wave g</b>       |                     | <b>Wave i</b>       |                     | <b>Wave j</b>       |                     | <b>Wave m</b>       |
|                 |                     | <b>Wave h</b>       |                     | <b>Wave j</b>       |                     | <b>Wave l</b>       |                     |
| Cohorts         | Cohort 1            |                     |                     |                     |                     |                     |                     |
|                 |                     |                     |                     | Cohort 2            |                     |                     |                     |

## Supplementary file S2. Attrition pattern in cohort 1

Baseline sample: 41,855  
 Attrition in 2020: 8,466  
 Attrition in 2021: 11,897  
 Attrition in 2022: 13,564

### Ordered logit regression of attrition in subsequent waves by baseline variables

|                                      | Estimate | Std. Error | t value | Pr(> t ) |
|--------------------------------------|----------|------------|---------|----------|
| <b>(Intercept)</b>                   | 0.250    | 0.016      | 15.331  | 0.000    |
| <b>FinancialHardship2016</b>         | 0.014    | 0.006      | 2.370   | 0.018    |
| <b>FinancialUncertainty2016</b>      | -0.012   | 0.008      | -1.506  | 0.132    |
| <b>ghq</b>                           | 0.001    | 0.000      | 1.822   | 0.068    |
| <b>sex_female</b>                    | -0.002   | 0.005      | -0.357  | 0.721    |
| <b>age</b>                           | -0.003   | 0.000      | -11.785 | 0.000    |
| <b>isced</b>                         | -0.009   | 0.007      | -1.178  | 0.239    |
| <b>country_LondonandSouthEngland</b> | 0.003    | 0.005      | 0.573   | 0.567    |
| <b>coupleandchildren</b>             | 0.012    | 0.007      | 1.749   | 0.080    |
| <b>singleandchildren</b>             | 0.029    | 0.011      | 2.578   | 0.010    |
| <b>single</b>                        | 0.014    | 0.007      | 2.120   | 0.034    |
| <b>own_mortgage</b>                  | -0.007   | 0.007      | -1.018  | 0.309    |
| <b>own_rent</b>                      | 0.011    | 0.008      | 1.490   | 0.136    |
| <b>save</b>                          | -0.022   | 0.005      | -4.337  | 0.000    |
| <b>IMD_1</b>                         | 0.027    | 0.007      | 3.870   | 0.000    |
| <b>IMD_2</b>                         | 0.001    | 0.007      | 0.143   | 0.886    |
| <b>IMD_5</b>                         | -0.002   | 0.006      | -0.383  | 0.702    |
| <b>empl_16_unemployed</b>            | 0.028    | 0.014      | 2.038   | 0.042    |
| <b>empl_16_student</b>               | 0.021    | 0.012      | 1.772   | 0.076    |
| <b>empl_16_retired</b>               | 0.004    | 0.009      | 0.518   | 0.604    |
| <b>empl_16_self</b>                  | 0.002    | 0.009      | 0.256   | 0.798    |
| <b>empl_16_sick</b>                  | 0.005    | 0.017      | 0.324   | 0.746    |
| <b>empl_16_maternity</b>             | 0.003    | 0.011      | 0.237   | 0.813    |

(Dispersion parameter for gaussian family taken to be 0.1020826)

Null deviance: 1887.4 on 17859 degrees of freedom

Residual deviance: 1820.8 on 17837 degrees of freedom

## Supplementary file S.3. Attrition pattern in cohort 2

Baseline sample: 33,588  
 Attrition in 2020: 5,953  
 Attrition in 2021: 8,649  
 Attrition in 2022: 10,342

### Ordered logit regression of attrition in subsequent waves by baseline variables

|                                      | Estimate | Std. Error | t value | Pr(> t ) |
|--------------------------------------|----------|------------|---------|----------|
| <b>(Intercept)</b>                   | 0.462    | 0.020      | 23.513  | 0.000    |
| <b>FinancialHardship2019</b>         | 0.004    | 0.008      | 0.552   | 0.581    |
| <b>FinancialUncertainty2019</b>      | -0.048   | 0.010      | -4.832  | 0.000    |
| <b>ghq</b>                           | 0.002    | 0.001      | 3.181   | 0.001    |
| <b>sex_female</b>                    | -0.031   | 0.007      | -4.644  | 0.000    |
| <b>age</b>                           | -0.003   | 0.000      | -11.355 | 0.000    |
| <b>iscd</b>                          | -0.017   | 0.010      | -1.701  | 0.089    |
| <b>country_LondonandSouthEngland</b> | -0.002   | 0.007      | -0.301  | 0.764    |
| <b>coupleandchildren</b>             | 0.048    | 0.009      | 5.617   | 0.000    |
| <b>singleandchildren</b>             | 0.117    | 0.014      | 8.260   | 0.000    |
| <b>single</b>                        | 0.042    | 0.009      | 4.763   | 0.000    |
| <b>own_mortgage</b>                  | 0.009    | 0.009      | 0.964   | 0.335    |
| <b>own_rent</b>                      | 0.093    | 0.010      | 9.431   | 0.000    |
| <b>save</b>                          | -0.066   | 0.007      | -9.539  | 0.000    |
| <b>IMD_1</b>                         | 0.060    | 0.009      | 6.495   | 0.000    |
| <b>IMD_2</b>                         | 0.027    | 0.009      | 2.999   | 0.003    |
| <b>IMD_5</b>                         | -0.046   | 0.009      | -5.249  | 0.000    |
| <b>empl_unemployed</b>               | 0.075    | 0.018      | 4.210   | 0.000    |
| <b>empl_student</b>                  | 0.070    | 0.015      | 4.608   | 0.000    |
| <b>empl_retired</b>                  | 0.078    | 0.012      | 6.607   | 0.000    |
| <b>empl_self</b>                     | 0.049    | 0.012      | 4.022   | 0.000    |
| <b>empl_sick</b>                     | 0.018    | 0.020      | 0.862   | 0.388    |
| <b>empl_maternity</b>                | 0.048    | 0.017      | 2.917   | 0.004    |

(Dispersion parameter for gaussian family taken to be 0.2167649)

Null deviance: 4971.5 on 21482 degrees of freedom

Residual deviance: 4651.8 on 21460 degrees of freedom

## Supplementary file S.4. GHQ-36, density plots and cross-sectional change

Figure S.4.1. GHQ-36 density plot by year in cohort 1 (including cross-sectional and inverse probability weights)

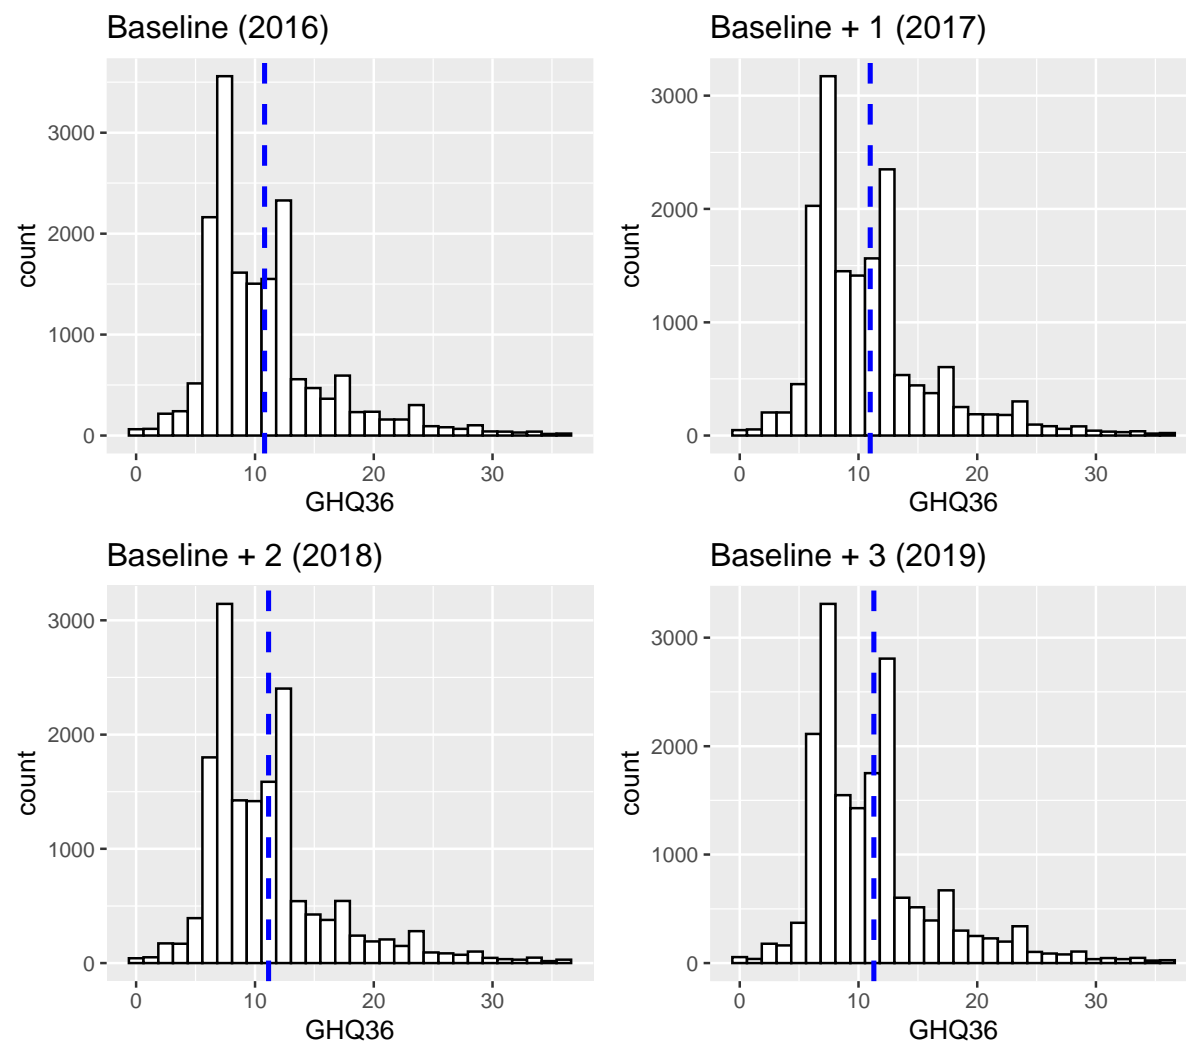

| time    | GHQ-36 means |
|---------|--------------|
| 1 2016. | 10.80600     |
| 2 2017  | 10.99273     |
| 3 2018  | 11.14514     |
| 4 2019  | 11.28897     |

Figure S.4.2. GHQ-36 density plot by year in cohort 2 (including cross-sectional and inverse probability weights)

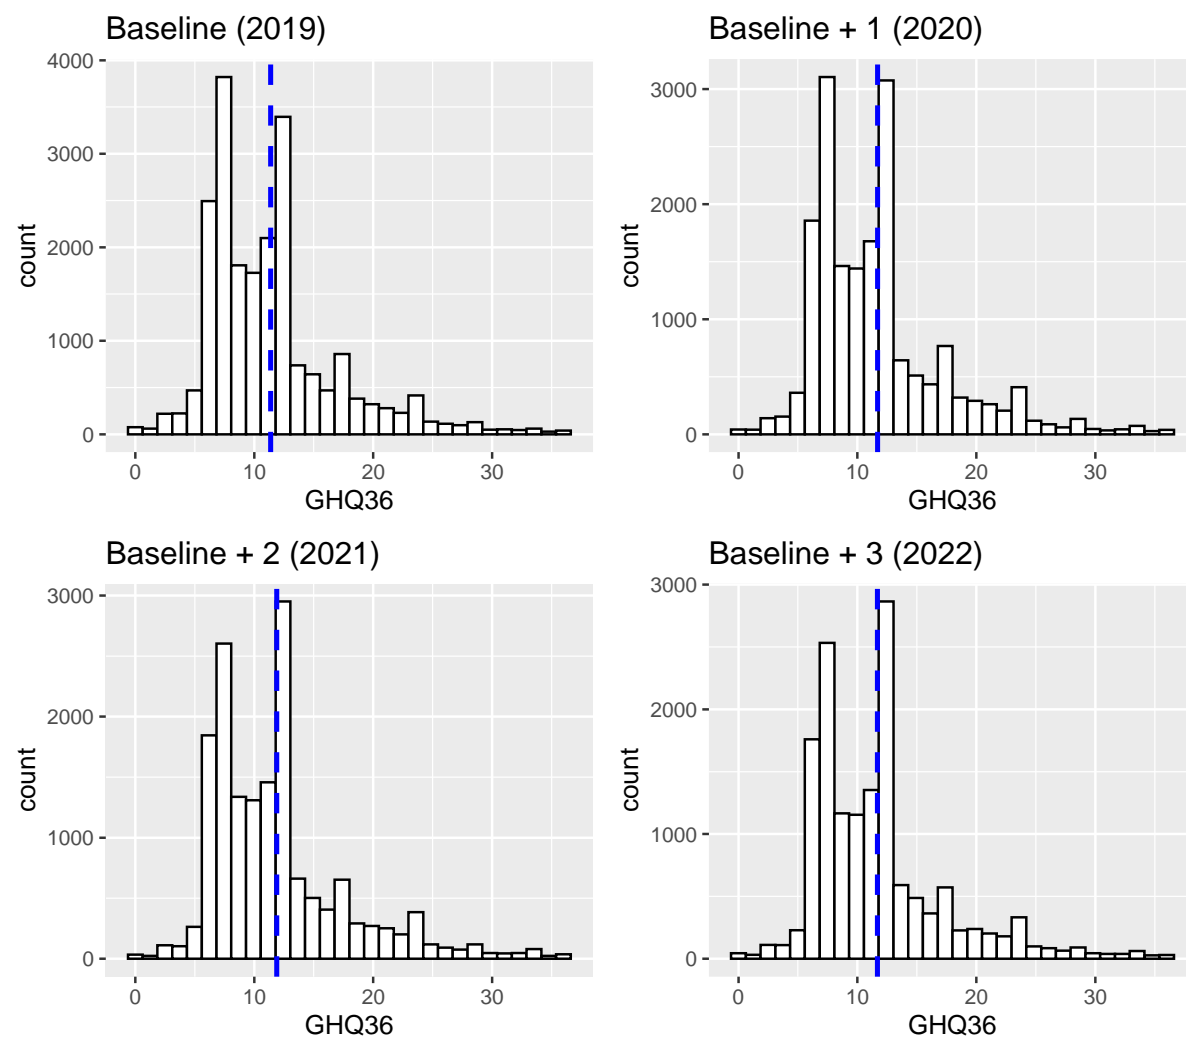

| time | GHQ-36 means |
|------|--------------|
| 2019 | 11.37476     |
| 2020 | 11.69447     |
| 2021 | 11.88569     |
| 2022 | 11.68791     |

Figure S.4.3. Percentages of GHQ caseness based on GHQ-36 by year), financial uncertainty, financial hardship and consumer price inflation (z-axis) from 1991 to 2022

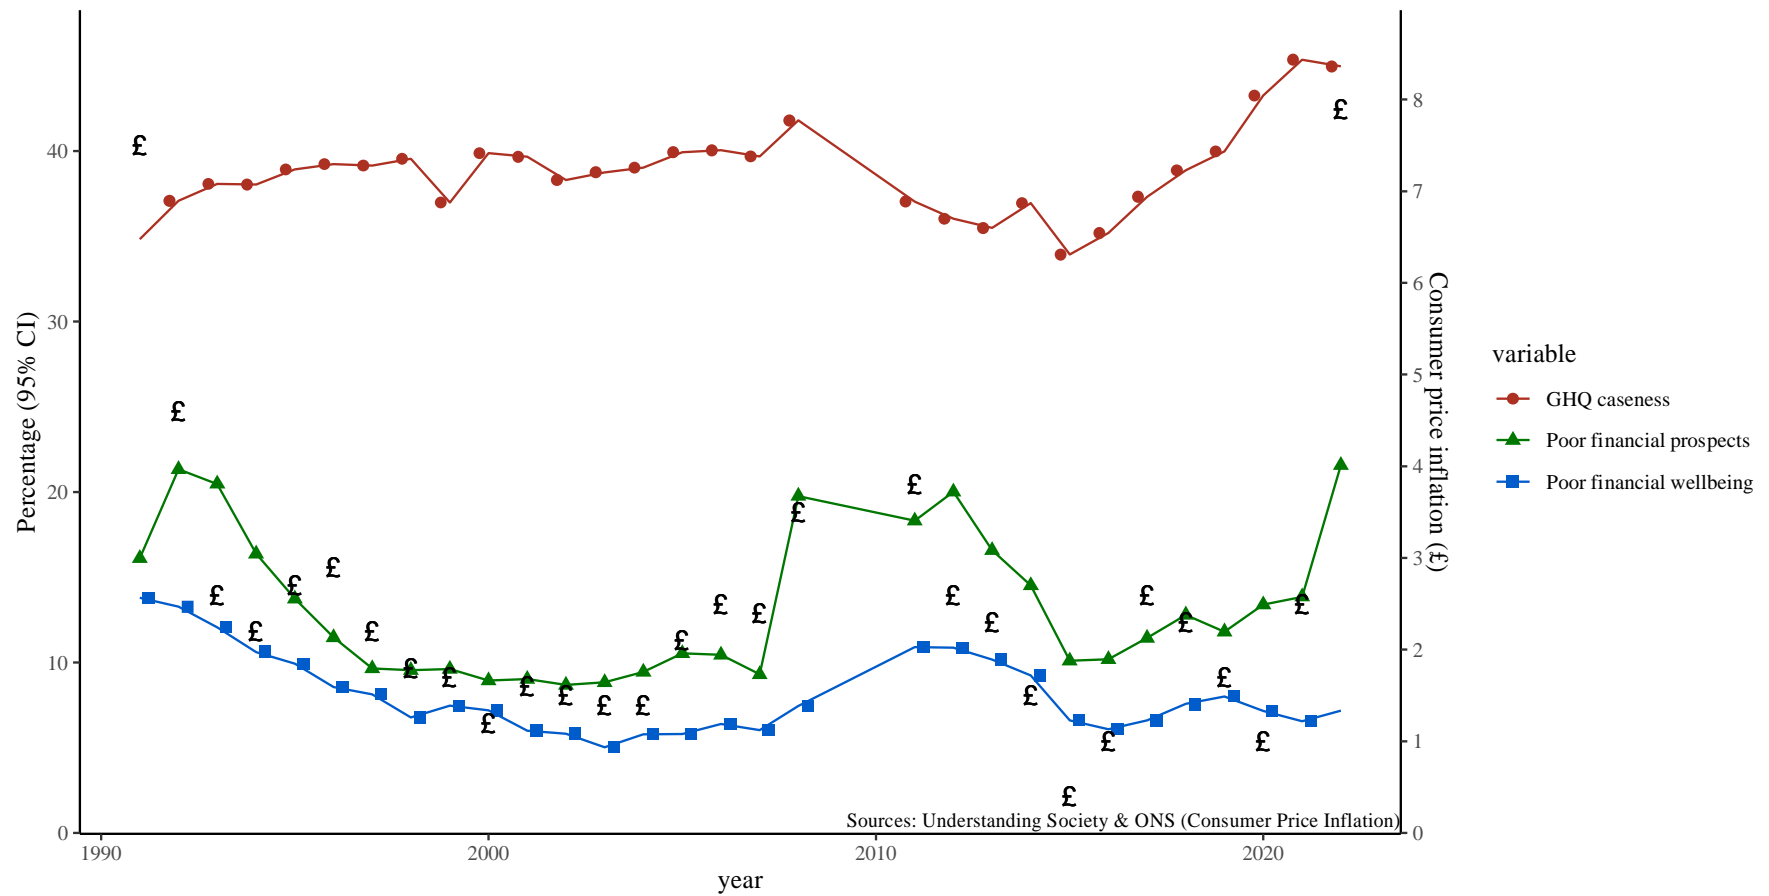

Note: Percentages and 95%CI calculated yearly based on the combination of the British Household Panel Survey (BHPS) and the UK Longitudinal Survey (UKHLS) for the full population aged 16 and over. GHQ-caseness is calculated based on GHQ-36 with a cut-point at 9. The consumer price inflation is derived from Office for National Statistics (2024). Ref.: Office for National Statistics. Consumer price inflation time series. Published 2024. Accessed January 3, 2024. <https://www.ons.gov.uk/economy/inflationandpriceindices/datasets/consumerpriceindices>. Data are weighted using USoc-provided yearly cross-sectional weights.

Supplementary file S.5. LGM results for cohort 1 (2016-2019)

| <b>Financial hardship (cross-sectional baseline weight)</b> |                       |       |          |          |                           |       |          |          |                        |       |          |          |            |       |          |          |
|-------------------------------------------------------------|-----------------------|-------|----------|----------|---------------------------|-------|----------|----------|------------------------|-------|----------|----------|------------|-------|----------|----------|
| term                                                        | Employment adjustment |       |          |          | Socio-economic adjustment |       |          |          | Demographic adjustment |       |          |          | Unadjusted |       |          |          |
|                                                             | Estimate              | SE    | CI lower | CI upper | Estimate                  | SE    | CI lower | CI upper | Estimate               | SE    | CI lower | CI upper | Estimate   | SE    | CI lower | CI upper |
| ghq_16 ~ ghq_16                                             | 11.957                | 0.468 | 11.039   | 12.875   | 11.979                    | 0.472 | 11.054   | 12.904   | 11.854                 | 0.431 | 11.010   | 12.698   | 11.722     | 0.399 | 10.940   | 12.504   |
| ghq_17 ~ ghq_17                                             | 12.924                | 0.383 | 12.173   | 13.674   | 12.896                    | 0.382 | 12.147   | 13.646   | 13.273                 | 0.370 | 12.548   | 13.997   | 13.062     | 0.343 | 12.389   | 13.734   |
| ghq_18 ~ ghq_18                                             | 13.419                | 0.391 | 12.652   | 14.186   | 13.434                    | 0.393 | 12.663   | 14.205   | 13.113                 | 0.349 | 12.428   | 13.798   | 13.037     | 0.323 | 12.404   | 13.670   |
| ghq_19 ~ ghq_19                                             | 11.529                | 0.471 | 10.606   | 12.452   | 11.525                    | 0.476 | 10.592   | 12.458   | 11.483                 | 0.431 | 10.637   | 12.329   | 11.305     | 0.399 | 10.524   | 12.087   |
| i ~ age                                                     | -0.010                | 0.005 | -0.019   | 0.000    | -0.015                    | 0.004 | -0.022   | -0.008   | -0.020                 | 0.003 | -0.025   | -0.014   |            |       |          |          |
| i ~ country_LondonandSouthEngland                           | -0.065                | 0.097 | -0.256   | 0.126    | -0.085                    | 0.100 | -0.280   | 0.110    | -0.090                 | 0.094 | -0.275   | 0.094    |            |       |          |          |
| i ~ coupleandchildren                                       | -0.310                | 0.129 | -0.564   | -0.056   | -0.373                    | 0.131 | -0.629   | -0.116   | -0.343                 | 0.116 | -0.570   | -0.116   |            |       |          |          |
| i ~ empl_16_maternity                                       | 0.514                 | 0.268 | -0.012   | 1.040    |                           |       |          |          |                        |       |          |          |            |       |          |          |
| i ~ empl_16_retired                                         | -0.253                | 0.145 | -0.537   | 0.032    |                           |       |          |          |                        |       |          |          |            |       |          |          |
| i ~ empl_16_self                                            | -0.270                | 0.154 | -0.571   | 0.032    |                           |       |          |          |                        |       |          |          |            |       |          |          |
| i ~ empl_16_sick                                            | 5.179                 | 0.461 | 4.276    | 6.082    |                           |       |          |          |                        |       |          |          |            |       |          |          |
| i ~ empl_16_student                                         | 0.171                 | 0.266 | -0.350   | 0.692    |                           |       |          |          |                        |       |          |          |            |       |          |          |
| i ~ empl_16_unemployed                                      | 1.002                 | 0.359 | 0.300    | 1.705    |                           |       |          |          |                        |       |          |          |            |       |          |          |
| i ~ empl_maternity                                          | 0.113                 | 0.317 | -0.509   | 0.735    | 0.346                     | 0.310 | -0.260   | 0.953    | 0.394                  | 0.279 | -0.152   | 0.941    |            |       |          |          |
| i ~ FinancialHardship2016                                   | 2.378                 | 0.138 | 2.108    | 2.648    | 2.670                     | 0.140 | 2.395    | 2.945    | 2.974                  | 0.126 | 2.727    | 3.222    | 3.169      | 0.117 | 2.940    | 3.399    |
| i ~ IMD_1                                                   | -0.155                | 0.180 | -0.507   | 0.197    | 0.024                     | 0.184 | -0.338   | 0.385    |                        |       |          |          |            |       |          |          |
| i ~ IMD_2                                                   | -0.037                | 0.157 | -0.345   | 0.271    | -0.022                    | 0.159 | -0.334   | 0.289    |                        |       |          |          |            |       |          |          |
| i ~ IMD_4                                                   | -0.165                | 0.139 | -0.436   | 0.107    | -0.185                    | 0.142 | -0.463   | 0.093    |                        |       |          |          |            |       |          |          |
| i ~ IMD_5                                                   | -0.229                | 0.134 | -0.492   | 0.034    | -0.225                    | 0.136 | -0.490   | 0.041    |                        |       |          |          |            |       |          |          |
| i ~ isced                                                   | 0.361                 | 0.130 | 0.107    | 0.615    | 0.296                     | 0.130 | 0.040    | 0.552    | 0.161                  | 0.120 | -0.075   | 0.397    |            |       |          |          |
| i ~ own_mortgage                                            | 0.175                 | 0.123 | -0.066   | 0.415    | 0.229                     | 0.120 | -0.007   | 0.465    |                        |       |          |          |            |       |          |          |
| i ~ own_rent                                                | 0.438                 | 0.156 | 0.133    | 0.743    | 0.738                     | 0.157 | 0.430    | 1.047    |                        |       |          |          |            |       |          |          |
| i ~ save                                                    | -0.177                | 0.098 | -0.370   | 0.016    | -0.259                    | 0.100 | -0.454   | -0.064   |                        |       |          |          |            |       |          |          |
| i ~ sex_female                                              | 0.997                 | 0.097 | 0.808    | 1.187    | 0.989                     | 0.099 | 0.795    | 1.182    | 1.024                  | 0.090 | 0.848    | 1.201    |            |       |          |          |
| i ~ single                                                  | 0.402                 | 0.127 | 0.152    | 0.652    | 0.568                     | 0.132 | 0.310    | 0.826    | 0.697                  | 0.119 | 0.464    | 0.930    |            |       |          |          |
| i ~ singleandchildren                                       | 0.169                 | 0.283 | -0.387   | 0.724    | 0.053                     | 0.285 | -0.507   | 0.612    | 0.356                  | 0.261 | -0.155   | 0.867    |            |       |          |          |
| i ~ i                                                       | 13.932                | 0.491 | 12.970   | 14.893   | 14.897                    | 0.518 | 13.882   | 15.911   | 15.119                 | 0.480 | 14.178   | 16.061   | 15.608     | 0.454 | 14.718   | 16.498   |
| i ~ s                                                       | -0.965                | 0.160 | -1.279   | -0.651   | -0.976                    | 0.163 | -1.295   | -0.657   | -1.051                 | 0.151 | -1.347   | -0.756   | -1.008     | 0.140 | -1.283   | -0.733   |
| s ~ age                                                     | -0.006                | 0.002 | -0.010   | -0.002   | -0.005                    | 0.001 | -0.008   | -0.003   | -0.004                 | 0.001 | -0.006   | -0.002   |            |       |          |          |
| s ~ country_LondonandSouthEngland                           | 0.060                 | 0.036 | -0.011   | 0.131    | 0.053                     | 0.036 | -0.018   | 0.125    | 0.063                  | 0.034 | -0.004   | 0.131    |            |       |          |          |
| s ~ coupleandchildren                                       | 0.053                 | 0.050 | -0.046   | 0.152    | 0.026                     | 0.050 | -0.072   | 0.124    | 0.038                  | 0.044 | -0.048   | 0.125    |            |       |          |          |
| s ~ empl_17_maternity                                       | -0.468                | 0.118 | -0.699   | -0.237   |                           |       |          |          |                        |       |          |          |            |       |          |          |
| s ~ empl_17_retired                                         | 0.011                 | 0.088 | -0.162   | 0.184    |                           |       |          |          |                        |       |          |          |            |       |          |          |
| s ~ empl_17_self                                            | -0.105                | 0.093 | -0.287   | 0.077    |                           |       |          |          |                        |       |          |          |            |       |          |          |
| s ~ empl_17_sick                                            | -0.799                | 0.216 | -1.223   | -0.376   |                           |       |          |          |                        |       |          |          |            |       |          |          |
| s ~ empl_17_student                                         | -0.091                | 0.132 | -0.350   | 0.169    |                           |       |          |          |                        |       |          |          |            |       |          |          |
| s ~ empl_17_unemployed                                      | -0.502                | 0.134 | -0.765   | -0.240   |                           |       |          |          |                        |       |          |          |            |       |          |          |
| s ~ empl_18_maternity                                       | 0.284                 | 0.124 | 0.042    | 0.526    |                           |       |          |          |                        |       |          |          |            |       |          |          |
| s ~ empl_18_retired                                         | 0.050                 | 0.098 | -0.142   | 0.243    |                           |       |          |          |                        |       |          |          |            |       |          |          |
| s ~ empl_18_self                                            | 0.119                 | 0.117 | -0.110   | 0.347    |                           |       |          |          |                        |       |          |          |            |       |          |          |
| s ~ empl_18_sick                                            | -0.055                | 0.223 | -0.492   | 0.383    |                           |       |          |          |                        |       |          |          |            |       |          |          |
| s ~ empl_18_student                                         | 0.225                 | 0.170 | -0.107   | 0.558    |                           |       |          |          |                        |       |          |          |            |       |          |          |
| s ~ empl_18_unemployed                                      | 0.509                 | 0.156 | 0.203    | 0.816    |                           |       |          |          |                        |       |          |          |            |       |          |          |
| s ~ empl_maternity                                          | 0.102                 | 0.129 | -0.152   | 0.355    | -0.030                    | 0.099 | -0.223   | 0.164    | -0.009                 | 0.089 | -0.183   | 0.165    |            |       |          |          |
| s ~ empl_retired                                            | 0.004                 | 0.086 | -0.163   | 0.172    |                           |       |          |          |                        |       |          |          |            |       |          |          |
| s ~ empl_self                                               | -0.010                | 0.100 | -0.207   | 0.187    |                           |       |          |          |                        |       |          |          |            |       |          |          |
| s ~ empl_sick                                               | 1.444                 | 0.215 | 1.022    | 1.865    |                           |       |          |          |                        |       |          |          |            |       |          |          |
| s ~ empl_student                                            | -0.274                | 0.161 | -0.589   | 0.040    |                           |       |          |          |                        |       |          |          |            |       |          |          |
| s ~ empl_unemployed                                         | 0.381                 | 0.148 | 0.091    | 0.672    |                           |       |          |          |                        |       |          |          |            |       |          |          |



|                                                      |        |       |        |        |        |       |        |        |        |       |        |        |        |       |        |        |
|------------------------------------------------------|--------|-------|--------|--------|--------|-------|--------|--------|--------|-------|--------|--------|--------|-------|--------|--------|
| s ~ FinancialHardship2016                            | -0.654 | 0.056 | -0.764 | -0.544 | -0.651 | 0.056 | -0.762 | -0.541 | -0.672 | 0.051 | -0.772 | -0.572 | -0.671 | 0.047 | -0.763 | -0.579 |
| s ~ FinancialHardship2017to2019_Constant_hardship    | 0.870  | 0.066 | 0.741  | 1.000  | 0.927  | 0.068 | 0.794  | 1.060  | 0.981  | 0.062 | 0.860  | 1.103  | 1.013  | 0.057 | 0.901  | 1.124  |
| s ~ FinancialHardship2017to2019_b+3 hardship         | 0.740  | 0.086 | 0.572  | 0.907  | 0.765  | 0.087 | 0.595  | 0.936  | 0.729  | 0.077 | 0.578  | 0.880  | 0.782  | 0.072 | 0.640  | 0.924  |
| s ~ FinancialHardship2017to2019_b+1 and b+3 hardship | 0.463  | 0.105 | 0.258  | 0.668  | 0.531  | 0.101 | 0.332  | 0.729  | 0.559  | 0.091 | 0.380  | 0.737  | 0.632  | 0.087 | 0.462  | 0.803  |
| s ~ FinancialHardship2017to2019_b+1 hardship         | 0.119  | 0.065 | -0.009 | 0.246  | 0.097  | 0.066 | -0.032 | 0.226  | 0.101  | 0.059 | -0.016 | 0.217  | 0.142  | 0.054 | 0.035  | 0.249  |
| s ~ FinancialHardship2017to2019_b+1 and b+2 hardship | 0.222  | 0.093 | 0.040  | 0.403  | 0.234  | 0.094 | 0.049  | 0.420  | 0.261  | 0.084 | 0.096  | 0.427  | 0.289  | 0.078 | 0.137  | 0.442  |
| s ~ FinancialHardship2017to2019_b+2 and b+3 hardship | 0.803  | 0.082 | 0.642  | 0.963  | 0.872  | 0.085 | 0.706  | 1.039  | 0.949  | 0.078 | 0.796  | 1.102  | 1.002  | 0.074 | 0.857  | 1.147  |
| s ~ FinancialHardship2017to2019_b+2 hardship         | 0.394  | 0.070 | 0.257  | 0.531  | 0.428  | 0.067 | 0.296  | 0.560  | 0.420  | 0.061 | 0.300  | 0.539  | 0.466  | 0.057 | 0.354  | 0.578  |
| s ~ IMD_1                                            | -0.010 | 0.062 | -0.133 | 0.112  | 0.007  | 0.063 | -0.117 | 0.131  |        |       |        |        |        |       |        |        |
| s ~ IMD_2                                            | -0.020 | 0.056 | -0.130 | 0.090  | -0.019 | 0.056 | -0.130 | 0.091  |        |       |        |        |        |       |        |        |
| s ~ IMD_4                                            | 0.077  | 0.051 | -0.023 | 0.177  | 0.075  | 0.051 | -0.025 | 0.176  |        |       |        |        |        |       |        |        |
| s ~ IMD_5                                            | 0.063  | 0.050 | -0.034 | 0.161  | 0.061  | 0.050 | -0.036 | 0.159  |        |       |        |        |        |       |        |        |
| s ~ isced                                            | -0.141 | 0.048 | -0.235 | -0.047 | -0.133 | 0.049 | -0.228 | -0.038 | -0.135 | 0.047 | -0.227 | -0.043 |        |       |        |        |
| s ~ own_mortgage                                     | -0.029 | 0.046 | -0.120 | 0.062  | -0.039 | 0.045 | -0.127 | 0.050  |        |       |        |        |        |       |        |        |
| s ~ own_rent                                         | -0.012 | 0.057 | -0.124 | 0.100  | 0.016  | 0.057 | -0.095 | 0.128  |        |       |        |        |        |       |        |        |
| s ~ save                                             | -0.046 | 0.036 | -0.117 | 0.025  | -0.057 | 0.036 | -0.128 | 0.013  |        |       |        |        |        |       |        |        |
| s ~ sex_female                                       | -0.055 | 0.035 | -0.124 | 0.015  | -0.061 | 0.036 | -0.130 | 0.009  | -0.057 | 0.033 | -0.121 | 0.006  |        |       |        |        |
| s ~ single                                           | -0.077 | 0.046 | -0.167 | 0.014  | -0.054 | 0.046 | -0.145 | 0.036  | -0.043 | 0.041 | -0.124 | 0.038  |        |       |        |        |
| s ~ singleandchildren                                | -0.033 | 0.102 | -0.233 | 0.168  | -0.063 | 0.102 | -0.263 | 0.137  | -0.030 | 0.093 | -0.212 | 0.152  |        |       |        |        |
| s ~ s                                                | 0.681  | 0.086 | 0.513  | 0.848  | 0.712  | 0.087 | 0.542  | 0.883  | 0.750  | 0.080 | 0.592  | 0.907  | 0.741  | 0.075 | 0.595  | 0.887  |

## Financial hardship (cross-sectional baseline weight and ipw for attrition)

| term                              | Employment adjustment |       |          |          | Socio-economic adjustment |       |          |          | Demographic adjustment |       |          |          | Unadjusted |       |          |          |
|-----------------------------------|-----------------------|-------|----------|----------|---------------------------|-------|----------|----------|------------------------|-------|----------|----------|------------|-------|----------|----------|
|                                   | Estimate              | SE    | CI lower | CI upper | Estimate                  | SE    | CI lower | CI upper | Estimate               | SE    | CI lower | CI upper | Estimate   | SE    | CI lower | CI upper |
| ghq_16 ~ ghq_16                   | 12.033                | 0.491 | 11.071   | 12.994   | 12.065                    | 0.494 | 11.096   | 13.034   | 12.066                 | 0.496 | 11.095   | 13.038   | 12.103     | 0.499 | 11.124   | 13.082   |
| ghq_17 ~ ghq_17                   | 13.186                | 0.407 | 12.389   | 13.983   | 13.150                    | 0.406 | 12.355   | 13.946   | 13.144                 | 0.406 | 12.348   | 13.940   | 13.120     | 0.407 | 12.322   | 13.918   |
| ghq_18 ~ ghq_18                   | 13.694                | 0.418 | 12.875   | 14.513   | 13.700                    | 0.420 | 12.877   | 14.522   | 13.701                 | 0.421 | 12.876   | 14.526   | 13.694     | 0.421 | 12.867   | 14.520   |
| ghq_19 ~ ghq_19                   | 11.885                | 0.499 | 10.907   | 12.864   | 11.910                    | 0.507 | 10.915   | 12.904   | 11.919                 | 0.511 | 10.919   | 12.920   | 11.939     | 0.517 | 10.926   | 12.952   |
| i ~ age                           | -0.009                | 0.005 | -0.019   | 0.001    | -0.014                    | 0.004 | -0.022   | -0.007   | -0.019                 | 0.003 | -0.026   | -0.012   |            |       |          |          |
| i ~ country_LondonandSouthEngland | -0.099                | 0.101 | -0.297   | 0.098    | -0.114                    | 0.103 | -0.317   | 0.088    | -0.138                 | 0.104 | -0.342   | 0.065    |            |       |          |          |
| i ~ coupleandchildren             | -0.324                | 0.134 | -0.587   | -0.062   | -0.382                    | 0.135 | -0.647   | -0.118   | -0.310                 | 0.130 | -0.566   | -0.054   |            |       |          |          |
| i ~ empl_16_maternity             | 0.485                 | 0.281 | -0.065   | 1.035    |                           |       |          |          |                        |       |          |          |            |       |          |          |
| i ~ empl_16_retired               | -0.280                | 0.149 | -0.571   | 0.011    |                           |       |          |          |                        |       |          |          |            |       |          |          |
| i ~ empl_16_self                  | -0.236                | 0.157 | -0.544   | 0.072    |                           |       |          |          |                        |       |          |          |            |       |          |          |
| i ~ empl_16_sick                  | 5.240                 | 0.479 | 4.302    | 6.179    |                           |       |          |          |                        |       |          |          |            |       |          |          |
| i ~ empl_16_student               | 0.214                 | 0.269 | -0.314   | 0.742    |                           |       |          |          |                        |       |          |          |            |       |          |          |
| i ~ empl_16_unemployed            | 0.969                 | 0.378 | 0.228    | 1.710    |                           |       |          |          |                        |       |          |          |            |       |          |          |
| i ~ empl_maternity                | 0.143                 | 0.334 | -0.512   | 0.799    | 0.360                     | 0.326 | -0.280   | 0.999    | 0.494                  | 0.324 | -0.142   | 1.130    |            |       |          |          |
| i ~ FinancialHardship2016         | 2.389                 | 0.143 | 2.109    | 2.669    | 2.676                     | 0.145 | 2.391    | 2.961    | 2.932                  | 0.143 | 2.652    | 3.212    | 3.085      | 0.143 | 2.805    | 3.365    |
| i ~ IMD_1                         | -0.116                | 0.186 | -0.480   | 0.247    | 0.070                     | 0.191 | -0.304   | 0.443    |                        |       |          |          |            |       |          |          |
| i ~ IMD_2                         | 0.026                 | 0.162 | -0.292   | 0.344    | 0.036                     | 0.164 | -0.286   | 0.357    |                        |       |          |          |            |       |          |          |
| i ~ IMD_4                         | -0.150                | 0.143 | -0.430   | 0.130    | -0.176                    | 0.146 | -0.463   | 0.111    |                        |       |          |          |            |       |          |          |
| i ~ IMD_5                         | -0.205                | 0.138 | -0.476   | 0.066    | -0.201                    | 0.140 | -0.475   | 0.073    |                        |       |          |          |            |       |          |          |
| i ~ isced                         | 0.369                 | 0.134 | 0.106    | 0.631    | 0.304                     | 0.135 | 0.040    | 0.568    | 0.198                  | 0.134 | -0.065   | 0.462    |            |       |          |          |
| i ~ own_mortgage                  | 0.165                 | 0.126 | -0.083   | 0.412    | 0.230                     | 0.124 | -0.013   | 0.472    |                        |       |          |          |            |       |          |          |
| i ~ own_rent                      | 0.441                 | 0.159 | 0.129    | 0.752    | 0.745                     | 0.161 | 0.430    | 1.061    |                        |       |          |          |            |       |          |          |
| i ~ save                          | -0.134                | 0.102 | -0.335   | 0.067    | -0.219                    | 0.104 | -0.422   | -0.016   |                        |       |          |          |            |       |          |          |
| i ~ sex_female                    | 1.023                 | 0.101 | 0.826    | 1.221    | 1.007                     | 0.103 | 0.806    | 1.209    | 1.007                  | 0.103 | 0.805    | 1.209    |            |       |          |          |
| i ~ single                        | 0.353                 | 0.132 | 0.094    | 0.612    | 0.527                     | 0.137 | 0.258    | 0.797    | 0.730                  | 0.138 | 0.459    | 1.001    |            |       |          |          |
| i ~ singleandchildren             | 0.140                 | 0.294 | -0.437   | 0.716    | 0.022                     | 0.297 | -0.559   | 0.604    | 0.298                  | 0.294 | -0.279   | 0.875    |            |       |          |          |
| i ~ i                             | 14.075                | 0.517 | 13.061   | 15.089   | 15.057                    | 0.548 | 13.984   | 16.131   | 15.169                 | 0.553 | 14.084   | 16.254   | 15.665     | 0.567 | 14.554   | 16.777   |
| i ~ s                             | -0.973                | 0.168 | -1.302   | -0.644   | -0.972                    | 0.171 | -1.308   | -0.637   | -0.983                 | 0.172 | -1.320   | -0.646   | -0.994     | 0.174 | -1.334   | -0.654   |
| s ~ age                           | -0.007                | 0.002 | -0.010   | -0.003   | -0.006                    | 0.001 | -0.008   | -0.003   | -0.005                 | 0.001 | -0.008   | -0.003   |            |       |          |          |
| s ~ country_LondonandSouthEngland | 0.075                 | 0.038 | 0.001    | 0.148    | 0.068                     | 0.038 | -0.007   | 0.142    | 0.070                  | 0.038 | -0.004   | 0.144    |            |       |          |          |
| s ~ coupleandchildren             | 0.052                 | 0.052 | -0.051   | 0.154    | 0.021                     | 0.052 | -0.080   | 0.123    | 0.015                  | 0.050 | -0.084   | 0.114    |            |       |          |          |
| s ~ empl_17_maternity             | -0.504                | 0.123 | -0.745   | -0.262   |                           |       |          |          |                        |       |          |          |            |       |          |          |
| s ~ empl_17_retired               | -0.003                | 0.090 | -0.179   | 0.174    |                           |       |          |          |                        |       |          |          |            |       |          |          |

|                                                      |        |       |        |        |        |       |        |        |        |       |        |        |        |       |        |        |  |
|------------------------------------------------------|--------|-------|--------|--------|--------|-------|--------|--------|--------|-------|--------|--------|--------|-------|--------|--------|--|
| s ~ empl_17_self                                     | -0.105 | 0.094 | -0.288 | 0.079  |        |       |        |        |        |       |        |        |        |       |        |        |  |
| s ~ empl_17_sick                                     | -0.814 | 0.226 | -1.258 | -0.371 |        |       |        |        |        |       |        |        |        |       |        |        |  |
| s ~ empl_17_student                                  | -0.095 | 0.136 | -0.361 | 0.171  |        |       |        |        |        |       |        |        |        |       |        |        |  |
| s ~ empl_17_unemployed                               | -0.519 | 0.143 | -0.800 | -0.239 |        |       |        |        |        |       |        |        |        |       |        |        |  |
| s ~ empl_18_maternity                                | 0.253  | 0.128 | 0.002  | 0.504  |        |       |        |        |        |       |        |        |        |       |        |        |  |
| s ~ empl_18_retired                                  | 0.072  | 0.100 | -0.124 | 0.269  |        |       |        |        |        |       |        |        |        |       |        |        |  |
| s ~ empl_18_self                                     | 0.101  | 0.124 | -0.142 | 0.344  |        |       |        |        |        |       |        |        |        |       |        |        |  |
| s ~ empl_18_sick                                     | -0.125 | 0.238 | -0.591 | 0.341  |        |       |        |        |        |       |        |        |        |       |        |        |  |
| s ~ empl_18_student                                  | 0.227  | 0.176 | -0.118 | 0.571  |        |       |        |        |        |       |        |        |        |       |        |        |  |
| s ~ empl_18_unemployed                               | 0.537  | 0.168 | 0.208  | 0.867  |        |       |        |        |        |       |        |        |        |       |        |        |  |
| s ~ empl_maternity                                   | 0.147  | 0.135 | -0.118 | 0.413  | -0.017 | 0.105 | -0.222 | 0.188  | -0.006 | 0.104 | -0.210 | 0.198  |        |       |        |        |  |
| s ~ empl_retired                                     | -0.003 | 0.086 | -0.172 | 0.166  |        |       |        |        |        |       |        |        |        |       |        |        |  |
| s ~ empl_self                                        | -0.014 | 0.105 | -0.221 | 0.193  |        |       |        |        |        |       |        |        |        |       |        |        |  |
| s ~ empl_sick                                        | 1.534  | 0.228 | 1.087  | 1.981  |        |       |        |        |        |       |        |        |        |       |        |        |  |
| s ~ empl_student                                     | -0.304 | 0.166 | -0.630 | 0.022  |        |       |        |        |        |       |        |        |        |       |        |        |  |
| s ~ empl_unemployed                                  | 0.368  | 0.155 | 0.065  | 0.671  |        |       |        |        |        |       |        |        |        |       |        |        |  |
| s ~ FinancialHardship2016                            | -0.662 | 0.058 | -0.776 | -0.547 | -0.658 | 0.059 | -0.773 | -0.543 | -0.674 | 0.058 | -0.787 | -0.561 | -0.690 | 0.058 | -0.803 | -0.576 |  |
| s ~ FinancialHardship2017to2019_Constant_hardship    | 0.891  | 0.068 | 0.757  | 1.025  | 0.950  | 0.070 | 0.812  | 1.088  | 1.021  | 0.071 | 0.883  | 1.159  | 1.068  | 0.071 | 0.929  | 1.207  |  |
| s ~ FinancialHardship2017to2019_b+3 hardship         | 0.735  | 0.088 | 0.564  | 0.907  | 0.763  | 0.089 | 0.588  | 0.938  | 0.808  | 0.089 | 0.633  | 0.982  | 0.894  | 0.090 | 0.719  | 1.070  |  |
| s ~ FinancialHardship2017to2019_b+1 and b+3 hardship | 0.502  | 0.111 | 0.284  | 0.721  | 0.567  | 0.108 | 0.355  | 0.779  | 0.629  | 0.108 | 0.417  | 0.840  | 0.686  | 0.110 | 0.469  | 0.902  |  |
| s ~ FinancialHardship2017to2019_b+1 hardship         | 0.109  | 0.066 | -0.021 | 0.239  | 0.081  | 0.067 | -0.051 | 0.212  | 0.118  | 0.067 | -0.013 | 0.249  | 0.163  | 0.066 | 0.034  | 0.292  |  |
| s ~ FinancialHardship2017to2019_b+1 and b+2 hardship | 0.269  | 0.096 | 0.082  | 0.457  | 0.284  | 0.097 | 0.094  | 0.474  | 0.316  | 0.097 | 0.126  | 0.506  | 0.366  | 0.097 | 0.176  | 0.557  |  |
| s ~ FinancialHardship2017to2019_b+2 and b+3 hardship | 0.817  | 0.085 | 0.649  | 0.984  | 0.891  | 0.089 | 0.717  | 1.065  | 0.951  | 0.089 | 0.777  | 1.124  | 1.020  | 0.089 | 0.845  | 1.194  |  |
| s ~ FinancialHardship2017to2019_b+2 hardship         | 0.400  | 0.073 | 0.257  | 0.543  | 0.436  | 0.070 | 0.299  | 0.573  | 0.474  | 0.070 | 0.337  | 0.611  | 0.518  | 0.069 | 0.381  | 0.654  |  |
| s ~ IMD_1                                            | -0.012 | 0.064 | -0.138 | 0.114  | 0.006  | 0.065 | -0.121 | 0.133  |        |       |        |        |        |       |        |        |  |
| s ~ IMD_2                                            | -0.025 | 0.059 | -0.140 | 0.090  | -0.026 | 0.059 | -0.141 | 0.090  |        |       |        |        |        |       |        |        |  |
| s ~ IMD_4                                            | 0.085  | 0.053 | -0.019 | 0.190  | 0.083  | 0.053 | -0.022 | 0.187  |        |       |        |        |        |       |        |        |  |
| s ~ IMD_5                                            | 0.065  | 0.051 | -0.035 | 0.166  | 0.062  | 0.051 | -0.039 | 0.163  |        |       |        |        |        |       |        |        |  |
| s ~ isced                                            | -0.144 | 0.050 | -0.241 | -0.046 | -0.135 | 0.050 | -0.234 | -0.036 | -0.139 | 0.050 | -0.237 | -0.040 |        |       |        |        |  |
| s ~ own_mortgage                                     | -0.031 | 0.048 | -0.125 | 0.062  | -0.037 | 0.047 | -0.129 | 0.054  |        |       |        |        |        |       |        |        |  |
| s ~ own_rent                                         | 0.001  | 0.059 | -0.114 | 0.116  | 0.033  | 0.058 | -0.081 | 0.148  |        |       |        |        |        |       |        |        |  |
| s ~ save                                             | -0.059 | 0.038 | -0.133 | 0.016  | -0.070 | 0.038 | -0.143 | 0.004  |        |       |        |        |        |       |        |        |  |
| s ~ sex_female                                       | -0.064 | 0.037 | -0.136 | 0.009  | -0.073 | 0.037 | -0.146 | 0.000  | -0.070 | 0.037 | -0.143 | 0.003  |        |       |        |        |  |
| s ~ single                                           | -0.064 | 0.048 | -0.158 | 0.031  | -0.035 | 0.048 | -0.129 | 0.059  | -0.035 | 0.048 | -0.128 | 0.059  |        |       |        |        |  |
| s ~ singleandchildren                                | -0.024 | 0.105 | -0.231 | 0.183  | -0.062 | 0.105 | -0.268 | 0.144  | -0.061 | 0.105 | -0.267 | 0.144  |        |       |        |        |  |
| s ~ s                                                | 0.681  | 0.090 | 0.505  | 0.858  | 0.712  | 0.092 | 0.532  | 0.893  | 0.720  | 0.092 | 0.539  | 0.901  | 0.732  | 0.094 | 0.548  | 0.915  |  |

### Financial uncertainty (cross-sectional baseline weight)

| term                              | Employment adjustment |       |          |          | Socio-economic adjustment |       |          |          | Demographic adjustment |       |          |          | Unadjusted |       |          |          |
|-----------------------------------|-----------------------|-------|----------|----------|---------------------------|-------|----------|----------|------------------------|-------|----------|----------|------------|-------|----------|----------|
|                                   | Estimate              | SE    | CI lower | CI upper | Estimate                  | SE    | CI lower | CI upper | Estimate               | SE    | CI lower | CI upper | Estimate   | SE    | CI lower | CI upper |
| ghq_16 ~ ghq_16                   | 11.650                | 0.479 | 10.711   | 12.588   | 11.670                    | 0.481 | 10.727   | 12.613   | 11.579                 | 0.442 | 10.714   | 12.444   | 11.464     | 0.410 | 10.661   | 12.267   |
| ghq_17 ~ ghq_17                   | 12.816                | 0.393 | 12.046   | 13.587   | 12.788                    | 0.393 | 12.018   | 13.557   | 13.157                 | 0.383 | 12.406   | 13.907   | 12.958     | 0.356 | 12.261   | 13.655   |
| ghq_18 ~ ghq_18                   | 13.261                | 0.400 | 12.477   | 14.045   | 13.270                    | 0.402 | 12.483   | 14.057   | 12.949                 | 0.359 | 12.246   | 13.653   | 12.887     | 0.333 | 12.233   | 13.540   |
| ghq_19 ~ ghq_19                   | 11.401                | 0.483 | 10.455   | 12.347   | 11.415                    | 0.488 | 10.459   | 12.371   | 11.367                 | 0.445 | 10.494   | 12.239   | 11.231     | 0.415 | 10.418   | 12.044   |
| i ~ age                           | -0.008                | 0.005 | -0.017   | 0.002    | -0.015                    | 0.004 | -0.023   | -0.008   | -0.024                 | 0.003 | -0.030   | -0.018   |            |       |          |          |
| i ~ country_LondonandSouthEngland | -0.048                | 0.099 | -0.243   | 0.147    | -0.061                    | 0.102 | -0.260   | 0.139    | -0.072                 | 0.097 | -0.263   | 0.119    |            |       |          |          |
| i ~ coupleandchildren             | -0.215                | 0.134 | -0.478   | 0.047    | -0.250                    | 0.135 | -0.515   | 0.015    | -0.111                 | 0.120 | -0.346   | 0.124    |            |       |          |          |
| i ~ empl_16_maternity             | 0.615                 | 0.278 | 0.070    | 1.161    |                           |       |          |          |                        |       |          |          |            |       |          |          |
| i ~ empl_16_retired               | -0.432                | 0.149 | -0.724   | -0.140   |                           |       |          |          |                        |       |          |          |            |       |          |          |
| i ~ empl_16_self                  | -0.165                | 0.156 | -0.471   | 0.140    |                           |       |          |          |                        |       |          |          |            |       |          |          |
| i ~ empl_16_sick                  | 5.557                 | 0.504 | 4.569    | 6.545    |                           |       |          |          |                        |       |          |          |            |       |          |          |
| i ~ empl_16_student               | 0.157                 | 0.278 | -0.388   | 0.702    |                           |       |          |          |                        |       |          |          |            |       |          |          |
| i ~ empl_16_unemployed            | 1.266                 | 0.371 | 0.539    | 1.993    |                           |       |          |          |                        |       |          |          |            |       |          |          |
| i ~ empl_maternity                | 0.081                 | 0.319 | -0.544   | 0.705    | 0.377                     | 0.305 | -0.220   | 0.975    | 0.569                  | 0.273 | 0.034    | 1.104    |            |       |          |          |
| i ~ FinancialUncertainty2016      | 1.725                 | 0.177 | 1.379    | 2.071    | 1.904                     | 0.183 | 1.544    | 2.263    | 1.931                  | 0.172 | 1.593    | 2.268    | 2.003      | 0.164 | 1.682    | 2.325    |
| i ~ IMD_1                         | 0.093                 | 0.183 | -0.265   | 0.451    | 0.304                     | 0.188 | -0.065   | 0.673    |                        |       |          |          |            |       |          |          |
| i ~ IMD_2                         | 0.104                 | 0.161 | -0.211   | 0.419    | 0.125                     | 0.163 | -0.195   | 0.446    |                        |       |          |          |            |       |          |          |
| i ~ IMD_4                         | -0.156                | 0.140 | -0.431   | 0.118    | -0.190                    | 0.144 | -0.472   | 0.092    |                        |       |          |          |            |       |          |          |

|                                                         |        |       |        |        |        |       |        |        |        |       |        |        |        |       |        |        |  |
|---------------------------------------------------------|--------|-------|--------|--------|--------|-------|--------|--------|--------|-------|--------|--------|--------|-------|--------|--------|--|
| i ~ IMD_5                                               | -0.242 | 0.136 | -0.508 | 0.024  | -0.252 | 0.138 | -0.522 | 0.019  |        |       |        |        |        |       |        |        |  |
| i ~ isced                                               | 0.267  | 0.133 | 0.006  | 0.528  | 0.184  | 0.134 | -0.079 | 0.447  | -0.107 | 0.125 | -0.352 | 0.137  |        |       |        |        |  |
| i ~ own_mortgage                                        | 0.353  | 0.125 | 0.107  | 0.598  | 0.469  | 0.123 | 0.227  | 0.711  |        |       |        |        |        |       |        |        |  |
| i ~ own_rent                                            | 0.922  | 0.161 | 0.606  | 1.237  | 1.329  | 0.165 | 1.006  | 1.652  |        |       |        |        |        |       |        |        |  |
| i ~ save                                                | -0.417 | 0.100 | -0.612 | -0.222 | -0.550 | 0.101 | -0.748 | -0.353 |        |       |        |        |        |       |        |        |  |
| i ~ sex_female                                          | 0.969  | 0.099 | 0.774  | 1.164  | 0.943  | 0.102 | 0.744  | 1.143  | 0.979  | 0.094 | 0.795  | 1.163  |        |       |        |        |  |
| i ~ single                                              | 0.450  | 0.131 | 0.193  | 0.706  | 0.645  | 0.136 | 0.378  | 0.912  | 0.983  | 0.126 | 0.735  | 1.230  |        |       |        |        |  |
| i ~ singleandchildren                                   | 0.445  | 0.292 | -0.128 | 1.017  | 0.370  | 0.294 | -0.205 | 0.946  | 1.027  | 0.264 | 0.509  | 1.545  |        |       |        |        |  |
| i ~ i                                                   | 14.229 | 0.512 | 13.226 | 15.231 | 15.329 | 0.548 | 14.255 | 16.403 | 15.914 | 0.523 | 14.890 | 16.939 | 16.657 | 0.501 | 15.675 | 17.639 |  |
| i ~ s                                                   | -1.054 | 0.165 | -1.377 | -0.731 | -1.071 | 0.168 | -1.401 | -0.741 | -1.086 | 0.157 | -1.394 | -0.778 | -0.979 | 0.147 | -1.266 | -0.692 |  |
| s ~ age                                                 | -0.008 | 0.002 | -0.011 | -0.004 | -0.007 | 0.001 | -0.010 | -0.004 | -0.006 | 0.001 | -0.009 | -0.004 |        |       |        |        |  |
| s ~ country_LondonandSouthEngland                       | 0.069  | 0.037 | -0.003 | 0.141  | 0.064  | 0.037 | -0.009 | 0.136  | 0.068  | 0.035 | -0.001 | 0.136  |        |       |        |        |  |
| s ~ coupleandchildren                                   | 0.083  | 0.051 | -0.017 | 0.183  | 0.059  | 0.051 | -0.040 | 0.159  | 0.086  | 0.045 | -0.001 | 0.174  |        |       |        |        |  |
| s ~ empl_17_maternity                                   | -0.487 | 0.123 | -0.728 | -0.247 |        |       |        |        |        |       |        |        |        |       |        |        |  |
| s ~ empl_17_retired                                     | 0.081  | 0.090 | -0.094 | 0.257  |        |       |        |        |        |       |        |        |        |       |        |        |  |
| s ~ empl_17_self                                        | -0.054 | 0.093 | -0.237 | 0.129  |        |       |        |        |        |       |        |        |        |       |        |        |  |
| s ~ empl_17_sick                                        | -0.775 | 0.219 | -1.205 | -0.346 |        |       |        |        |        |       |        |        |        |       |        |        |  |
| s ~ empl_17_student                                     | -0.055 | 0.143 | -0.334 | 0.224  |        |       |        |        |        |       |        |        |        |       |        |        |  |
| s ~ empl_17_unemployed                                  | -0.512 | 0.139 | -0.784 | -0.239 |        |       |        |        |        |       |        |        |        |       |        |        |  |
| s ~ empl_18_maternity                                   | 0.294  | 0.130 | 0.040  | 0.548  |        |       |        |        |        |       |        |        |        |       |        |        |  |
| s ~ empl_18_retired                                     | 0.036  | 0.100 | -0.160 | 0.231  |        |       |        |        |        |       |        |        |        |       |        |        |  |
| s ~ empl_18_self                                        | 0.103  | 0.121 | -0.134 | 0.341  |        |       |        |        |        |       |        |        |        |       |        |        |  |
| s ~ empl_18_sick                                        | 0.016  | 0.233 | -0.441 | 0.474  |        |       |        |        |        |       |        |        |        |       |        |        |  |
| s ~ empl_18_student                                     | 0.133  | 0.182 | -0.224 | 0.490  |        |       |        |        |        |       |        |        |        |       |        |        |  |
| s ~ empl_18_unemployed                                  | 0.552  | 0.166 | 0.227  | 0.877  |        |       |        |        |        |       |        |        |        |       |        |        |  |
| s ~ empl_maternity                                      | 0.063  | 0.132 | -0.196 | 0.322  | -0.057 | 0.101 | -0.256 | 0.142  | -0.007 | 0.091 | -0.184 | 0.171  |        |       |        |        |  |
| s ~ empl_retired                                        | -0.079 | 0.086 | -0.248 | 0.089  |        |       |        |        |        |       |        |        |        |       |        |        |  |
| s ~ empl_self                                           | -0.040 | 0.101 | -0.238 | 0.159  |        |       |        |        |        |       |        |        |        |       |        |        |  |
| s ~ empl_sick                                           | 1.311  | 0.238 | 0.845  | 1.777  |        |       |        |        |        |       |        |        |        |       |        |        |  |
| s ~ empl_student                                        | -0.324 | 0.172 | -0.660 | 0.013  |        |       |        |        |        |       |        |        |        |       |        |        |  |
| s ~ empl_unemployed                                     | 0.448  | 0.157 | 0.141  | 0.756  |        |       |        |        |        |       |        |        |        |       |        |        |  |
| s ~ FinancialUncertainty2016                            | -0.322 | 0.063 | -0.446 | -0.199 | -0.322 | 0.062 | -0.444 | -0.199 | -0.301 | 0.057 | -0.414 | -0.189 | -0.316 | 0.053 | -0.420 | -0.211 |  |
| s ~ FinancialHardship2017to2019_Constant_uncertainty    | 0.933  | 0.104 | 0.728  | 1.137  | 0.998  | 0.113 | 0.775  | 1.220  | 0.949  | 0.105 | 0.743  | 1.156  | 0.833  | 0.095 | 0.646  | 1.020  |  |
| s ~ FinancialHardship2017to2019_b+3 uncertainty         | 0.508  | 0.075 | 0.360  | 0.656  | 0.551  | 0.076 | 0.402  | 0.700  | 0.544  | 0.072 | 0.403  | 0.686  | 0.538  | 0.067 | 0.408  | 0.669  |  |
| s ~ FinancialHardship2017to2019_b+1 and b+3 uncertainty | 0.437  | 0.133 | 0.177  | 0.697  | 0.468  | 0.139 | 0.195  | 0.741  | 0.443  | 0.125 | 0.198  | 0.688  | 0.457  | 0.116 | 0.231  | 0.684  |  |
| s ~ FinancialHardship2017to2019_b+1 uncertainty         | 0.207  | 0.068 | 0.073  | 0.341  | 0.205  | 0.070 | 0.067  | 0.343  | 0.184  | 0.064 | 0.058  | 0.310  | 0.202  | 0.061 | 0.083  | 0.321  |  |
| s ~ FinancialHardship2017to2019_b+1 and b+2 uncertainty | 0.289  | 0.101 | 0.092  | 0.487  | 0.333  | 0.104 | 0.129  | 0.536  | 0.392  | 0.099 | 0.198  | 0.586  | 0.335  | 0.098 | 0.144  | 0.527  |  |
| s ~ FinancialHardship2017to2019_b+2 and b+3 uncertainty | 0.689  | 0.111 | 0.471  | 0.906  | 0.723  | 0.114 | 0.499  | 0.946  | 0.732  | 0.102 | 0.532  | 0.932  | 0.747  | 0.094 | 0.563  | 0.930  |  |
| s ~ FinancialHardship2017to2019_b+2 uncertainty         | 0.329  | 0.071 | 0.191  | 0.468  | 0.402  | 0.072 | 0.260  | 0.544  | 0.393  | 0.067 | 0.262  | 0.525  | 0.368  | 0.063 | 0.246  | 0.491  |  |
| s ~ IMD_1                                               | -0.036 | 0.064 | -0.161 | 0.089  | -0.012 | 0.064 | -0.137 | 0.113  |        |       |        |        |        |       |        |        |  |
| s ~ IMD_2                                               | -0.038 | 0.058 | -0.152 | 0.076  | -0.036 | 0.058 | -0.150 | 0.078  |        |       |        |        |        |       |        |        |  |
| s ~ IMD_4                                               | 0.062  | 0.053 | -0.042 | 0.165  | 0.060  | 0.053 | -0.044 | 0.163  |        |       |        |        |        |       |        |        |  |
| s ~ IMD_5                                               | 0.019  | 0.051 | -0.080 | 0.119  | 0.013  | 0.051 | -0.087 | 0.113  |        |       |        |        |        |       |        |        |  |
| s ~ isced                                               | -0.165 | 0.049 | -0.261 | -0.069 | -0.158 | 0.050 | -0.256 | -0.061 | -0.176 | 0.047 | -0.269 | -0.084 |        |       |        |        |  |
| s ~ own_mortgage                                        | -0.015 | 0.047 | -0.107 | 0.077  | -0.009 | 0.046 | -0.099 | 0.082  |        |       |        |        |        |       |        |        |  |
| s ~ own_rent                                            | 0.033  | 0.057 | -0.079 | 0.145  | 0.082  | 0.057 | -0.029 | 0.194  |        |       |        |        |        |       |        |        |  |
| s ~ save                                                | -0.120 | 0.037 | -0.193 | -0.048 | -0.144 | 0.037 | -0.216 | -0.072 |        |       |        |        |        |       |        |        |  |
| s ~ sex_female                                          | -0.056 | 0.036 | -0.127 | 0.015  | -0.067 | 0.036 | -0.138 | 0.004  | -0.059 | 0.033 | -0.124 | 0.006  |        |       |        |        |  |
| s ~ single                                              | -0.043 | 0.047 | -0.135 | 0.050  | -0.015 | 0.047 | -0.108 | 0.077  | 0.019  | 0.043 | -0.065 | 0.103  |        |       |        |        |  |
| s ~ singleandchildren                                   | -0.019 | 0.105 | -0.224 | 0.186  | -0.051 | 0.104 | -0.255 | 0.152  | 0.028  | 0.094 | -0.156 | 0.212  |        |       |        |        |  |
| s ~ s                                                   | 0.714  | 0.087 | 0.542  | 0.885  | 0.743  | 0.089 | 0.569  | 0.918  | 0.767  | 0.082 | 0.606  | 0.929  | 0.750  | 0.077 | 0.599  | 0.900  |  |

### Financial uncertainty (cross-sectional baseline weight and ipw for attrition)

| term            | Employment adjustment |       |          |          | Socio-economic adjustment |       |          |          | Demographic adjustment |       |          |          | Unadjusted |       |          |          | model.pit1 |
|-----------------|-----------------------|-------|----------|----------|---------------------------|-------|----------|----------|------------------------|-------|----------|----------|------------|-------|----------|----------|------------|
|                 | Estimate              | SE    | CI lower | CI upper | Estimate                  | SE    | CI lower | CI upper | Estimate               | SE    | CI lower | CI upper | Estimate   | SE    | CI lower | CI upper |            |
| ghq_16 ~ ghq_16 | 11.885                | 0.501 | 10.903   | 12.867   | 11.913                    | 0.505 | 10.923   | 12.902   | 11.923                 | 0.508 | 10.927   | 12.918   | 11.953     | 0.511 | 10.951   | 12.956   | model5w    |
| ghq_17 ~ ghq_17 | 13.164                | 0.416 | 12.349   | 13.980   | 13.129                    | 0.415 | 12.315   | 13.943   | 13.113                 | 0.417 | 12.295   | 13.931   | 13.084     | 0.419 | 12.263   | 13.905   | model5w    |

|                                                         |        |       |        |        |  |        |       |        |        |  |        |       |        |        |  |        |       |        |        |         |
|---------------------------------------------------------|--------|-------|--------|--------|--|--------|-------|--------|--------|--|--------|-------|--------|--------|--|--------|-------|--------|--------|---------|
| ghq_18 ~ ghq_18                                         | 13.641 | 0.425 | 12.808 | 14.474 |  | 13.653 | 0.427 | 12.817 | 14.489 |  | 13.656 | 0.430 | 12.813 | 14.499 |  | 13.659 | 0.433 | 12.810 | 14.507 | model5w |
| ghq_19 ~ ghq_19                                         | 11.717 | 0.508 | 10.721 | 12.713 |  | 11.731 | 0.516 | 10.720 | 12.742 |  | 11.749 | 0.525 | 10.720 | 12.778 |  | 11.763 | 0.537 | 10.711 | 12.815 | model5w |
| i ~ age                                                 | -0.007 | 0.005 | -0.017 | 0.003  |  | -0.014 | 0.004 | -0.022 | -0.007 |  | -0.023 | 0.003 | -0.030 | -0.017 |  |        |       |        |        |         |
| i ~ country_LondonandSouthEngland                       | -0.048 | 0.103 | -0.249 | 0.154  |  | -0.061 | 0.106 | -0.267 | 0.146  |  | -0.112 | 0.107 | -0.322 | 0.097  |  |        |       |        |        |         |
| i ~ coupleandchildren                                   | -0.218 | 0.138 | -0.488 | 0.052  |  | -0.249 | 0.139 | -0.521 | 0.024  |  | -0.049 | 0.135 | -0.313 | 0.215  |  |        |       |        |        |         |
| i ~ empl_16_maternity                                   | 0.635  | 0.288 | 0.071  | 1.198  |  |        |       |        |        |  |        |       |        |        |  |        |       |        |        |         |
| i ~ empl_16_retired                                     | -0.456 | 0.153 | -0.756 | -0.157 |  |        |       |        |        |  |        |       |        |        |  |        |       |        |        |         |
| i ~ empl_16_self                                        | -0.151 | 0.163 | -0.470 | 0.169  |  |        |       |        |        |  |        |       |        |        |  |        |       |        |        |         |
| i ~ empl_16_sick                                        | 5.589  | 0.504 | 4.601  | 6.577  |  |        |       |        |        |  |        |       |        |        |  |        |       |        |        |         |
| i ~ empl_16_student                                     | 0.134  | 0.285 | -0.424 | 0.693  |  |        |       |        |        |  |        |       |        |        |  |        |       |        |        |         |
| i ~ empl_16_unemployed                                  | 1.305  | 0.387 | 0.546  | 2.064  |  |        |       |        |        |  |        |       |        |        |  |        |       |        |        |         |
| i ~ empl_maternity                                      | 0.067  | 0.330 | -0.580 | 0.714  |  | 0.376  | 0.317 | -0.244 | 0.997  |  | 0.682  | 0.315 | 0.064  | 1.300  |  |        |       |        |        |         |
| i ~ FinancialUncertainty2016                            | 1.741  | 0.182 | 1.383  | 2.098  |  | 1.927  | 0.189 | 1.556  | 2.298  |  | 1.968  | 0.193 | 1.589  | 2.347  |  | 1.965  | 0.198 | 1.577  | 2.353  | model5w |
| i ~ IMD_1                                               | 0.075  | 0.188 | -0.294 | 0.445  |  | 0.289  | 0.194 | -0.092 | 0.670  |  |        |       |        |        |  |        |       |        |        |         |
| i ~ IMD_2                                               | 0.116  | 0.167 | -0.210 | 0.443  |  | 0.134  | 0.169 | -0.197 | 0.466  |  |        |       |        |        |  |        |       |        |        |         |
| i ~ IMD_4                                               | -0.178 | 0.145 | -0.461 | 0.106  |  | -0.214 | 0.149 | -0.506 | 0.077  |  |        |       |        |        |  |        |       |        |        |         |
| i ~ IMD_5                                               | -0.251 | 0.140 | -0.526 | 0.023  |  | -0.260 | 0.142 | -0.540 | 0.019  |  |        |       |        |        |  |        |       |        |        |         |
| i ~ isced                                               | 0.268  | 0.137 | 0.000  | 0.536  |  | 0.183  | 0.138 | -0.087 | 0.453  |  | -0.070 | 0.139 | -0.342 | 0.201  |  |        |       |        |        |         |
| i ~ own_mortgage                                        | 0.337  | 0.128 | 0.087  | 0.588  |  | 0.466  | 0.126 | 0.218  | 0.714  |  |        |       |        |        |  |        |       |        |        |         |
| i ~ own_rent                                            | 0.922  | 0.163 | 0.601  | 1.242  |  | 1.345  | 0.167 | 1.018  | 1.673  |  |        |       |        |        |  |        |       |        |        |         |
| i ~ save                                                | -0.431 | 0.103 | -0.633 | -0.229 |  | -0.571 | 0.104 | -0.775 | -0.366 |  |        |       |        |        |  |        |       |        |        |         |
| i ~ sex_female                                          | 0.997  | 0.103 | 0.794  | 1.200  |  | 0.970  | 0.106 | 0.762  | 1.178  |  | 0.969  | 0.107 | 0.759  | 1.179  |  |        |       |        |        |         |
| i ~ single                                              | 0.449  | 0.135 | 0.184  | 0.714  |  | 0.654  | 0.141 | 0.377  | 0.931  |  | 1.108  | 0.145 | 0.825  | 1.392  |  |        |       |        |        |         |
| i ~ singleandchildren                                   | 0.389  | 0.300 | -0.200 | 0.978  |  | 0.316  | 0.302 | -0.276 | 0.908  |  | 0.964  | 0.298 | 0.380  | 1.548  |  |        |       |        |        |         |
| i ~ i                                                   | 14.491 | 0.538 | 13.437 | 15.545 |  | 15.643 | 0.574 | 14.517 | 16.769 |  | 16.098 | 0.596 | 14.930 | 17.267 |  | 16.819 | 0.620 | 15.604 | 18.034 | model5w |
| i ~ s                                                   | -1.060 | 0.173 | -1.400 | -0.720 |  | -1.073 | 0.177 | -1.421 | -0.726 |  | -1.028 | 0.180 | -1.380 | -0.677 |  | -0.973 | 0.183 | -1.331 | -0.615 | model5w |
| s ~ age                                                 | -0.008 | 0.002 | -0.012 | -0.005 |  | -0.008 | 0.001 | -0.011 | -0.005 |  | -0.008 | 0.001 | -0.010 | -0.005 |  |        |       |        |        |         |
| s ~ country_LondonandSouthEngland                       | 0.071  | 0.038 | -0.004 | 0.146  |  | 0.064  | 0.039 | -0.011 | 0.140  |  | 0.062  | 0.038 | -0.013 | 0.137  |  |        |       |        |        |         |
| s ~ coupleandchildren                                   | 0.079  | 0.053 | -0.025 | 0.182  |  | 0.053  | 0.053 | -0.050 | 0.156  |  | 0.067  | 0.051 | -0.032 | 0.167  |  |        |       |        |        |         |
| s ~ empl_17_maternity                                   | -0.519 | 0.128 | -0.769 | -0.269 |  |        |       |        |        |  |        |       |        |        |  |        |       |        |        |         |
| s ~ empl_17_retired                                     | 0.076  | 0.092 | -0.105 | 0.256  |  |        |       |        |        |  |        |       |        |        |  |        |       |        |        |         |
| s ~ empl_17_self                                        | -0.063 | 0.098 | -0.256 | 0.129  |  |        |       |        |        |  |        |       |        |        |  |        |       |        |        |         |
| s ~ empl_17_sick                                        | -0.816 | 0.228 | -1.263 | -0.368 |  |        |       |        |        |  |        |       |        |        |  |        |       |        |        |         |
| s ~ empl_17_student                                     | -0.066 | 0.147 | -0.353 | 0.221  |  |        |       |        |        |  |        |       |        |        |  |        |       |        |        |         |
| s ~ empl_17_unemployed                                  | -0.519 | 0.147 | -0.807 | -0.231 |  |        |       |        |        |  |        |       |        |        |  |        |       |        |        |         |
| s ~ empl_18_maternity                                   | 0.313  | 0.134 | 0.049  | 0.576  |  |        |       |        |        |  |        |       |        |        |  |        |       |        |        |         |
| s ~ empl_18_retired                                     | 0.045  | 0.103 | -0.156 | 0.246  |  |        |       |        |        |  |        |       |        |        |  |        |       |        |        |         |
| s ~ empl_18_self                                        | 0.114  | 0.129 | -0.139 | 0.366  |  |        |       |        |        |  |        |       |        |        |  |        |       |        |        |         |
| s ~ empl_18_sick                                        | 0.017  | 0.242 | -0.458 | 0.492  |  |        |       |        |        |  |        |       |        |        |  |        |       |        |        |         |
| s ~ empl_18_student                                     | 0.163  | 0.188 | -0.206 | 0.532  |  |        |       |        |        |  |        |       |        |        |  |        |       |        |        |         |
| s ~ empl_18_unemployed                                  | 0.578  | 0.176 | 0.232  | 0.923  |  |        |       |        |        |  |        |       |        |        |  |        |       |        |        |         |
| s ~ empl_maternity                                      | 0.080  | 0.136 | -0.187 | 0.348  |  | -0.047 | 0.106 | -0.254 | 0.161  |  | -0.008 | 0.105 | -0.215 | 0.199  |  |        |       |        |        |         |
| s ~ empl_retired                                        | -0.074 | 0.088 | -0.247 | 0.099  |  |        |       |        |        |  |        |       |        |        |  |        |       |        |        |         |
| s ~ empl_self                                           | -0.042 | 0.106 | -0.249 | 0.166  |  |        |       |        |        |  |        |       |        |        |  |        |       |        |        |         |
| s ~ empl_sick                                           | 1.364  | 0.244 | 0.885  | 1.843  |  |        |       |        |        |  |        |       |        |        |  |        |       |        |        |         |
| s ~ empl_student                                        | -0.350 | 0.176 | -0.696 | -0.004 |  |        |       |        |        |  |        |       |        |        |  |        |       |        |        |         |
| s ~ empl_unemployed                                     | 0.442  | 0.161 | 0.126  | 0.759  |  |        |       |        |        |  |        |       |        |        |  |        |       |        |        |         |
| s ~ FinancialUncertainty2016                            | -0.327 | 0.065 | -0.454 | -0.200 |  | -0.328 | 0.064 | -0.453 | -0.202 |  | -0.317 | 0.064 | -0.443 | -0.191 |  | -0.311 | 0.065 | -0.438 | -0.184 | model5w |
| s ~ FinancialHardship2017to2019_Constant_uncertainty    | 0.955  | 0.108 | 0.743  | 1.167  |  | 1.028  | 0.120 | 0.793  | 1.263  |  | 1.028  | 0.123 | 0.787  | 1.269  |  | 0.903  | 0.128 | 0.652  | 1.153  | model5w |
| s ~ FinancialHardship2017to2019_b+3 uncertainty         | 0.514  | 0.078 | 0.362  | 0.666  |  | 0.561  | 0.079 | 0.406  | 0.715  |  | 0.553  | 0.080 | 0.396  | 0.711  |  | 0.527  | 0.080 | 0.369  | 0.685  | model5w |
| s ~ FinancialHardship2017to2019_b+1 and b+3 uncertainty | 0.442  | 0.138 | 0.171  | 0.714  |  | 0.474  | 0.145 | 0.189  | 0.758  |  | 0.461  | 0.143 | 0.182  | 0.741  |  | 0.448  | 0.143 | 0.167  | 0.729  | model5w |
| s ~ FinancialHardship2017to2019_b+1 uncertainty         | 0.203  | 0.070 | 0.066  | 0.341  |  | 0.201  | 0.072 | 0.060  | 0.343  |  | 0.187  | 0.073 | 0.044  | 0.331  |  | 0.184  | 0.073 | 0.041  | 0.327  | model5w |
| s ~ FinancialHardship2017to2019_b+1 and b+2 uncertainty | 0.301  | 0.103 | 0.099  | 0.504  |  | 0.349  | 0.107 | 0.139  | 0.559  |  | 0.355  | 0.109 | 0.142  | 0.569  |  | 0.288  | 0.114 | 0.064  | 0.511  | model5w |
| s ~ FinancialHardship2017to2019_b+2 and b+3 uncertainty | 0.681  | 0.115 | 0.455  | 0.907  |  | 0.717  | 0.119 | 0.484  | 0.951  |  | 0.709  | 0.117 | 0.479  | 0.939  |  | 0.667  | 0.117 | 0.437  | 0.897  | model5w |
| s ~ FinancialHardship2017to2019_b+2 uncertainty         | 0.337  | 0.073 | 0.194  | 0.479  |  | 0.414  | 0.076 | 0.266  | 0.562  |  | 0.418  | 0.078 | 0.265  | 0.570  |  | 0.417  | 0.079 | 0.261  | 0.572  | model5w |
| s ~ IMD_1                                               | -0.030 | 0.066 | -0.159 | 0.099  |  | -0.004 | 0.066 | -0.133 | 0.126  |  |        |       |        |        |  |        |       |        |        |         |
| s ~ IMD_2                                               | -0.031 | 0.060 | -0.149 | 0.087  |  | -0.029 | 0.061 | -0.148 | 0.090  |  |        |       |        |        |  |        |       |        |        |         |
| s ~ IMD_4                                               | 0.068  | 0.055 | -0.040 | 0.175  |  | 0.065  | 0.055 | -0.042 | 0.173  |  |        |       |        |        |  |        |       |        |        |         |
| s ~ IMD_5                                               | 0.025  | 0.053 | -0.078 | 0.128  |  | 0.019  | 0.053 | -0.085 | 0.122  |  |        |       |        |        |  |        |       |        |        |         |
| s ~ isced                                               | -0.171 | 0.051 | -0.270 | -0.071 |  | -0.165 | 0.051 | -0.265 | -0.064 |  | -0.191 | 0.051 | -0.291 | -0.091 |  |        |       |        |        |         |

|                       |        |       |        |        |        |       |        |        |        |       |        |       |       |       |       |       |         |  |
|-----------------------|--------|-------|--------|--------|--------|-------|--------|--------|--------|-------|--------|-------|-------|-------|-------|-------|---------|--|
| s ~ own_mortgage      | -0.017 | 0.048 | -0.112 | 0.078  | -0.011 | 0.047 | -0.104 | 0.082  |        |       |        |       |       |       |       |       |         |  |
| s ~ own_rent          | 0.031  | 0.059 | -0.084 | 0.146  | 0.083  | 0.058 | -0.031 | 0.197  |        |       |        |       |       |       |       |       |         |  |
| s ~ save              | -0.127 | 0.039 | -0.203 | -0.052 | -0.153 | 0.038 | -0.227 | -0.078 |        |       |        |       |       |       |       |       |         |  |
| s ~ sex_female        | -0.064 | 0.038 | -0.138 | 0.010  | -0.077 | 0.038 | -0.151 | -0.003 | -0.074 | 0.038 | -0.148 | 0.000 |       |       |       |       |         |  |
| s ~ single            | -0.035 | 0.049 | -0.132 | 0.061  | -0.005 | 0.049 | -0.101 | 0.091  | 0.027  | 0.049 | -0.069 | 0.123 |       |       |       |       |         |  |
| s ~ singleandchildren | -0.013 | 0.107 | -0.222 | 0.197  | -0.048 | 0.106 | -0.256 | 0.160  | 0.005  | 0.105 | -0.200 | 0.210 |       |       |       |       |         |  |
| s ~ s                 | 0.729  | 0.092 | 0.548  | 0.910  | 0.762  | 0.095 | 0.576  | 0.947  | 0.767  | 0.095 | 0.580  | 0.955 | 0.785 | 0.097 | 0.595 | 0.976 | model5w |  |

## Financial hardship and uncertainty (cross-sectional baseline)

| term                              | Employment adjustment |       |          |          |  |  |  |  |  |  |  |  |  |  |  |  |  |  |  |  |  |
|-----------------------------------|-----------------------|-------|----------|----------|--|--|--|--|--|--|--|--|--|--|--|--|--|--|--|--|--|
|                                   | Estimate              | SE    | CI lower | CI upper |  |  |  |  |  |  |  |  |  |  |  |  |  |  |  |  |  |
| ghq_16 ~ ghq_16                   | 11.604                | 0.473 | 10.678   | 12.531   |  |  |  |  |  |  |  |  |  |  |  |  |  |  |  |  |  |
| ghq_17 ~ ghq_17                   | 12.832                | 0.389 | 12.069   | 13.596   |  |  |  |  |  |  |  |  |  |  |  |  |  |  |  |  |  |
| ghq_18 ~ ghq_18                   | 13.229                | 0.397 | 12.451   | 14.006   |  |  |  |  |  |  |  |  |  |  |  |  |  |  |  |  |  |
| ghq_19 ~ ghq_19                   | 11.437                | 0.479 | 10.499   | 12.376   |  |  |  |  |  |  |  |  |  |  |  |  |  |  |  |  |  |
| i ~ age                           | -0.012                | 0.005 | -0.022   | -0.003   |  |  |  |  |  |  |  |  |  |  |  |  |  |  |  |  |  |
| i ~ country_LondonandSouthEngland | -0.076                | 0.097 | -0.266   | 0.115    |  |  |  |  |  |  |  |  |  |  |  |  |  |  |  |  |  |
| i ~ coupleandchildren             | -0.329                | 0.131 | -0.586   | -0.072   |  |  |  |  |  |  |  |  |  |  |  |  |  |  |  |  |  |
| i ~ empl_16_maternity             | 0.467                 | 0.272 | -0.066   | 1.000    |  |  |  |  |  |  |  |  |  |  |  |  |  |  |  |  |  |
| i ~ empl_16_retired               | -0.225                | 0.145 | -0.509   | 0.059    |  |  |  |  |  |  |  |  |  |  |  |  |  |  |  |  |  |
| i ~ empl_16_self                  | -0.217                | 0.154 | -0.519   | 0.084    |  |  |  |  |  |  |  |  |  |  |  |  |  |  |  |  |  |
| i ~ empl_16_sick                  | 5.020                 | 0.493 | 4.054    | 5.987    |  |  |  |  |  |  |  |  |  |  |  |  |  |  |  |  |  |
| i ~ empl_16_student               | 0.226                 | 0.267 | -0.298   | 0.749    |  |  |  |  |  |  |  |  |  |  |  |  |  |  |  |  |  |
| i ~ empl_16_unemployed            | 0.846                 | 0.365 | 0.130    | 1.562    |  |  |  |  |  |  |  |  |  |  |  |  |  |  |  |  |  |
| i ~ empl_maternity                | 0.122                 | 0.315 | -0.495   | 0.739    |  |  |  |  |  |  |  |  |  |  |  |  |  |  |  |  |  |
| i ~ FinancialUncertainty2016      | 1.572                 | 0.176 | 1.228    | 1.917    |  |  |  |  |  |  |  |  |  |  |  |  |  |  |  |  |  |
| i ~ FinancialHardship2016         | 2.314                 | 0.141 | 2.037    | 2.590    |  |  |  |  |  |  |  |  |  |  |  |  |  |  |  |  |  |
| i ~ IMD_1                         | -0.057                | 0.180 | -0.410   | 0.296    |  |  |  |  |  |  |  |  |  |  |  |  |  |  |  |  |  |
| i ~ IMD_2                         | 0.066                 | 0.156 | -0.241   | 0.372    |  |  |  |  |  |  |  |  |  |  |  |  |  |  |  |  |  |
| i ~ IMD_4                         | -0.143                | 0.137 | -0.412   | 0.126    |  |  |  |  |  |  |  |  |  |  |  |  |  |  |  |  |  |
| i ~ IMD_5                         | -0.174                | 0.134 | -0.437   | 0.088    |  |  |  |  |  |  |  |  |  |  |  |  |  |  |  |  |  |
| i ~ isced                         | 0.379                 | 0.131 | 0.121    | 0.636    |  |  |  |  |  |  |  |  |  |  |  |  |  |  |  |  |  |
| i ~ own_mortgage                  | 0.166                 | 0.123 | -0.075   | 0.407    |  |  |  |  |  |  |  |  |  |  |  |  |  |  |  |  |  |
| i ~ own_rent                      | 0.431                 | 0.158 | 0.122    | 0.740    |  |  |  |  |  |  |  |  |  |  |  |  |  |  |  |  |  |
| i ~ save                          | -0.092                | 0.098 | -0.284   | 0.101    |  |  |  |  |  |  |  |  |  |  |  |  |  |  |  |  |  |
| i ~ sex_female                    | 0.994                 | 0.097 | 0.803    | 1.185    |  |  |  |  |  |  |  |  |  |  |  |  |  |  |  |  |  |
| i ~ single                        | 0.305                 | 0.128 | 0.054    | 0.556    |  |  |  |  |  |  |  |  |  |  |  |  |  |  |  |  |  |
| i ~ singleandchildren             | 0.150                 | 0.292 | -0.423   | 0.722    |  |  |  |  |  |  |  |  |  |  |  |  |  |  |  |  |  |
| i ~ i                             | 13.449                | 0.492 | 12.485   | 14.414   |  |  |  |  |  |  |  |  |  |  |  |  |  |  |  |  |  |
| i ~ s                             | -1.037                | 0.161 | -1.352   | -0.722   |  |  |  |  |  |  |  |  |  |  |  |  |  |  |  |  |  |
| s ~ age                           | -0.006                | 0.002 | -0.010   | -0.003   |  |  |  |  |  |  |  |  |  |  |  |  |  |  |  |  |  |
| s ~ country_LondonandSouthEngland | 0.077                 | 0.036 | 0.006    | 0.148    |  |  |  |  |  |  |  |  |  |  |  |  |  |  |  |  |  |
| s ~ coupleandchildren             | 0.063                 | 0.051 | -0.037   | 0.164    |  |  |  |  |  |  |  |  |  |  |  |  |  |  |  |  |  |
| s ~ empl_17_maternity             | -0.465                | 0.121 | -0.702   | -0.228   |  |  |  |  |  |  |  |  |  |  |  |  |  |  |  |  |  |
| s ~ empl_17_retired               | 0.047                 | 0.089 | -0.128   | 0.221    |  |  |  |  |  |  |  |  |  |  |  |  |  |  |  |  |  |
| s ~ empl_17_self                  | -0.068                | 0.091 | -0.248   | 0.111    |  |  |  |  |  |  |  |  |  |  |  |  |  |  |  |  |  |
| s ~ empl_17_sick                  | -0.764                | 0.216 | -1.187   | -0.340   |  |  |  |  |  |  |  |  |  |  |  |  |  |  |  |  |  |
| s ~ empl_17_student               | -0.067                | 0.139 | -0.340   | 0.206    |  |  |  |  |  |  |  |  |  |  |  |  |  |  |  |  |  |
| s ~ empl_17_unemployed            | -0.484                | 0.137 | -0.752   | -0.216   |  |  |  |  |  |  |  |  |  |  |  |  |  |  |  |  |  |
| s ~ empl_18_maternity             | 0.290                 | 0.128 | 0.040    | 0.540    |  |  |  |  |  |  |  |  |  |  |  |  |  |  |  |  |  |
| s ~ empl_18_retired               | 0.051                 | 0.098 | -0.142   | 0.244    |  |  |  |  |  |  |  |  |  |  |  |  |  |  |  |  |  |
| s ~ empl_18_self                  | 0.092                 | 0.120 | -0.143   | 0.328    |  |  |  |  |  |  |  |  |  |  |  |  |  |  |  |  |  |
| s ~ empl_18_sick                  | -0.008                | 0.228 | -0.454   | 0.438    |  |  |  |  |  |  |  |  |  |  |  |  |  |  |  |  |  |
| s ~ empl_18_student               | 0.151                 | 0.175 | -0.193   | 0.495    |  |  |  |  |  |  |  |  |  |  |  |  |  |  |  |  |  |
| s ~ empl_18_unemployed            | 0.509                 | 0.162 | 0.191    | 0.826    |  |  |  |  |  |  |  |  |  |  |  |  |  |  |  |  |  |
| s ~ empl_maternity                | 0.068                 | 0.134 | -0.193   | 0.330    |  |  |  |  |  |  |  |  |  |  |  |  |  |  |  |  |  |
| s ~ empl_retired                  | -0.045                | 0.085 | -0.211   | 0.120    |  |  |  |  |  |  |  |  |  |  |  |  |  |  |  |  |  |
| s ~ empl_self                     | -0.020                | 0.102 | -0.220   | 0.181    |  |  |  |  |  |  |  |  |  |  |  |  |  |  |  |  |  |

|                                                         |        |       |        |        |  |  |  |  |  |  |  |  |  |  |  |  |  |  |  |
|---------------------------------------------------------|--------|-------|--------|--------|--|--|--|--|--|--|--|--|--|--|--|--|--|--|--|
| s ~ empl_sick                                           | 1.327  | 0.228 | 0.879  | 1.775  |  |  |  |  |  |  |  |  |  |  |  |  |  |  |  |
| s ~ empl_student                                        | -0.348 | 0.164 | -0.669 | -0.027 |  |  |  |  |  |  |  |  |  |  |  |  |  |  |  |
| s ~ empl_unemployed                                     | 0.343  | 0.157 | 0.036  | 0.651  |  |  |  |  |  |  |  |  |  |  |  |  |  |  |  |
| s ~ FinancialUncertainty2016                            | -0.314 | 0.064 | -0.440 | -0.189 |  |  |  |  |  |  |  |  |  |  |  |  |  |  |  |
| s ~ FinancialHardship2017to2019_Constant_uncertainty    | 0.795  | 0.103 | 0.592  | 0.998  |  |  |  |  |  |  |  |  |  |  |  |  |  |  |  |
| s ~ FinancialHardship2017to2019_b+3 uncertainty         | 0.431  | 0.074 | 0.287  | 0.576  |  |  |  |  |  |  |  |  |  |  |  |  |  |  |  |
| s ~ FinancialHardship2017to2019_b+1 and b+3 uncertainty | 0.344  | 0.133 | 0.083  | 0.605  |  |  |  |  |  |  |  |  |  |  |  |  |  |  |  |
| s ~ FinancialHardship2017to2019_b+1 uncertainty         | 0.156  | 0.068 | 0.024  | 0.289  |  |  |  |  |  |  |  |  |  |  |  |  |  |  |  |
| s ~ FinancialHardship2017to2019_b+1 and b+2 uncertainty | 0.202  | 0.103 | 0.000  | 0.403  |  |  |  |  |  |  |  |  |  |  |  |  |  |  |  |
| s ~ FinancialHardship2017to2019_b+2 and b+3 uncertainty | 0.556  | 0.109 | 0.343  | 0.769  |  |  |  |  |  |  |  |  |  |  |  |  |  |  |  |
| s ~ FinancialHardship2017to2019_b+2 uncertainty         | 0.246  | 0.068 | 0.112  | 0.380  |  |  |  |  |  |  |  |  |  |  |  |  |  |  |  |
| s ~ FinancialHardship2016                               | -0.673 | 0.058 | -0.787 | -0.560 |  |  |  |  |  |  |  |  |  |  |  |  |  |  |  |
| s ~ FinancialHardship2017to2019_Constant_hardship       | 0.784  | 0.067 | 0.653  | 0.915  |  |  |  |  |  |  |  |  |  |  |  |  |  |  |  |
| s ~ FinancialHardship2017to2019_b+3 hardship            | 0.688  | 0.087 | 0.518  | 0.858  |  |  |  |  |  |  |  |  |  |  |  |  |  |  |  |
| s ~ FinancialHardship2017to2019_b+1 and b+3 hardship    | 0.460  | 0.110 | 0.243  | 0.676  |  |  |  |  |  |  |  |  |  |  |  |  |  |  |  |
| s ~ FinancialHardship2017to2019_b+1 hardship            | 0.116  | 0.067 | -0.015 | 0.247  |  |  |  |  |  |  |  |  |  |  |  |  |  |  |  |
| s ~ FinancialHardship2017to2019_b+1 and b+2 hardship    | 0.260  | 0.093 | 0.078  | 0.443  |  |  |  |  |  |  |  |  |  |  |  |  |  |  |  |
| s ~ FinancialHardship2017to2019_b+2 and b+3 hardship    | 0.748  | 0.084 | 0.583  | 0.913  |  |  |  |  |  |  |  |  |  |  |  |  |  |  |  |
| s ~ FinancialHardship2017to2019_b+2 hardship            | 0.351  | 0.072 | 0.210  | 0.493  |  |  |  |  |  |  |  |  |  |  |  |  |  |  |  |
| s ~ IMD_1                                               | -0.019 | 0.063 | -0.143 | 0.105  |  |  |  |  |  |  |  |  |  |  |  |  |  |  |  |
| s ~ IMD_2                                               | -0.039 | 0.057 | -0.152 | 0.073  |  |  |  |  |  |  |  |  |  |  |  |  |  |  |  |
| s ~ IMD_4                                               | 0.074  | 0.052 | -0.029 | 0.176  |  |  |  |  |  |  |  |  |  |  |  |  |  |  |  |
| s ~ IMD_5                                               | 0.033  | 0.050 | -0.066 | 0.131  |  |  |  |  |  |  |  |  |  |  |  |  |  |  |  |
| s ~ isced                                               | -0.158 | 0.049 | -0.254 | -0.062 |  |  |  |  |  |  |  |  |  |  |  |  |  |  |  |
| s ~ own_mortgage                                        | -0.020 | 0.047 | -0.112 | 0.072  |  |  |  |  |  |  |  |  |  |  |  |  |  |  |  |
| s ~ own_rent                                            | 0.041  | 0.059 | -0.074 | 0.156  |  |  |  |  |  |  |  |  |  |  |  |  |  |  |  |
| s ~ save                                                | -0.059 | 0.037 | -0.131 | 0.014  |  |  |  |  |  |  |  |  |  |  |  |  |  |  |  |
| s ~ sex_female                                          | -0.059 | 0.036 | -0.129 | 0.012  |  |  |  |  |  |  |  |  |  |  |  |  |  |  |  |
| s ~ single                                              | -0.050 | 0.047 | -0.142 | 0.042  |  |  |  |  |  |  |  |  |  |  |  |  |  |  |  |
| s ~ singleandchildren                                   | -0.060 | 0.105 | -0.266 | 0.146  |  |  |  |  |  |  |  |  |  |  |  |  |  |  |  |
| s ~ s                                                   | 0.673  | 0.086 | 0.506  | 0.841  |  |  |  |  |  |  |  |  |  |  |  |  |  |  |  |

## Financial hardship and uncertainty (cross-sectional baseline and ipw for attrition)

| term                              | Employment adjustment |       |          |          |  |  |  |  |  |  |  |  |  |  |  |  |  |  |  |
|-----------------------------------|-----------------------|-------|----------|----------|--|--|--|--|--|--|--|--|--|--|--|--|--|--|--|
|                                   | Estimate              | SE    | CI lower | CI upper |  |  |  |  |  |  |  |  |  |  |  |  |  |  |  |
| ghq_16 ~ ghq_16                   | 11.845                | 0.496 | 10.873   | 12.817   |  |  |  |  |  |  |  |  |  |  |  |  |  |  |  |
| ghq_17 ~ ghq_17                   | 13.175                | 0.412 | 12.368   | 13.982   |  |  |  |  |  |  |  |  |  |  |  |  |  |  |  |
| ghq_18 ~ ghq_18                   | 13.607                | 0.421 | 12.782   | 14.432   |  |  |  |  |  |  |  |  |  |  |  |  |  |  |  |
| ghq_19 ~ ghq_19                   | 11.774                | 0.505 | 10.785   | 12.763   |  |  |  |  |  |  |  |  |  |  |  |  |  |  |  |
| i ~ age                           | -0.012                | 0.005 | -0.022   | -0.002   |  |  |  |  |  |  |  |  |  |  |  |  |  |  |  |
| i ~ country_LondonandSouthEngland | -0.080                | 0.101 | -0.277   | 0.117    |  |  |  |  |  |  |  |  |  |  |  |  |  |  |  |
| i ~ coupleandchildren             | -0.333                | 0.135 | -0.597   | -0.069   |  |  |  |  |  |  |  |  |  |  |  |  |  |  |  |
| i ~ empl_16_maternity             | 0.480                 | 0.281 | -0.071   | 1.032    |  |  |  |  |  |  |  |  |  |  |  |  |  |  |  |
| i ~ empl_16_retired               | -0.241                | 0.148 | -0.531   | 0.050    |  |  |  |  |  |  |  |  |  |  |  |  |  |  |  |
| i ~ empl_16_self                  | -0.208                | 0.160 | -0.521   | 0.106    |  |  |  |  |  |  |  |  |  |  |  |  |  |  |  |
| i ~ empl_16_sick                  | 5.048                 | 0.494 | 4.080    | 6.016    |  |  |  |  |  |  |  |  |  |  |  |  |  |  |  |
| i ~ empl_16_student               | 0.203                 | 0.272 | -0.330   | 0.737    |  |  |  |  |  |  |  |  |  |  |  |  |  |  |  |
| i ~ empl_16_unemployed            | 0.851                 | 0.381 | 0.104    | 1.597    |  |  |  |  |  |  |  |  |  |  |  |  |  |  |  |
| i ~ empl_maternity                | 0.108                 | 0.325 | -0.529   | 0.744    |  |  |  |  |  |  |  |  |  |  |  |  |  |  |  |
| i ~ FinancialUncertainty2016      | 1.593                 | 0.182 | 1.237    | 1.950    |  |  |  |  |  |  |  |  |  |  |  |  |  |  |  |
| i ~ FinancialHardship2016         | 2.334                 | 0.145 | 2.050    | 2.619    |  |  |  |  |  |  |  |  |  |  |  |  |  |  |  |
| i ~ IMD_1                         | -0.072                | 0.186 | -0.437   | 0.292    |  |  |  |  |  |  |  |  |  |  |  |  |  |  |  |
| i ~ IMD_2                         | 0.066                 | 0.162 | -0.251   | 0.384    |  |  |  |  |  |  |  |  |  |  |  |  |  |  |  |
| i ~ IMD_4                         | -0.170                | 0.141 | -0.447   | 0.107    |  |  |  |  |  |  |  |  |  |  |  |  |  |  |  |
| i ~ IMD_5                         | -0.187                | 0.138 | -0.457   | 0.084    |  |  |  |  |  |  |  |  |  |  |  |  |  |  |  |
| i ~ isced                         | 0.382                 | 0.135 | 0.118    | 0.646    |  |  |  |  |  |  |  |  |  |  |  |  |  |  |  |
| i ~ own_mortgage                  | 0.154                 | 0.126 | -0.093   | 0.400    |  |  |  |  |  |  |  |  |  |  |  |  |  |  |  |
| i ~ own_rent                      | 0.427                 | 0.160 | 0.113    | 0.741    |  |  |  |  |  |  |  |  |  |  |  |  |  |  |  |

|                                                                |        |       |        |        |  |  |  |  |  |  |  |  |  |  |  |  |  |  |  |
|----------------------------------------------------------------|--------|-------|--------|--------|--|--|--|--|--|--|--|--|--|--|--|--|--|--|--|
| <b>i ~ save</b>                                                | -0.090 | 0.102 | -0.289 | 0.109  |  |  |  |  |  |  |  |  |  |  |  |  |  |  |  |
| <b>i ~ sex_female</b>                                          | 1.016  | 0.101 | 0.817  | 1.214  |  |  |  |  |  |  |  |  |  |  |  |  |  |  |  |
| <b>i ~ single</b>                                              | 0.301  | 0.133 | 0.041  | 0.561  |  |  |  |  |  |  |  |  |  |  |  |  |  |  |  |
| <b>i ~ singleandchildren</b>                                   | 0.108  | 0.300 | -0.479 | 0.695  |  |  |  |  |  |  |  |  |  |  |  |  |  |  |  |
| <b>i ~ i</b>                                                   | 13.697 | 0.518 | 12.682 | 14.711 |  |  |  |  |  |  |  |  |  |  |  |  |  |  |  |
| <b>i ~ s</b>                                                   | -1.045 | 0.169 | -1.376 | -0.715 |  |  |  |  |  |  |  |  |  |  |  |  |  |  |  |
| <b>s ~ age</b>                                                 | -0.007 | 0.002 | -0.011 | -0.004 |  |  |  |  |  |  |  |  |  |  |  |  |  |  |  |
| <b>s ~ country_LondonandSouthEngland</b>                       | 0.079  | 0.038 | 0.005  | 0.153  |  |  |  |  |  |  |  |  |  |  |  |  |  |  |  |
| <b>s ~ coupleandchildren</b>                                   | 0.060  | 0.053 | -0.043 | 0.164  |  |  |  |  |  |  |  |  |  |  |  |  |  |  |  |
| <b>s ~ empl_17_maternity</b>                                   | -0.492 | 0.126 | -0.738 | -0.245 |  |  |  |  |  |  |  |  |  |  |  |  |  |  |  |
| <b>s ~ empl_17_retired</b>                                     | 0.044  | 0.091 | -0.135 | 0.223  |  |  |  |  |  |  |  |  |  |  |  |  |  |  |  |
| <b>s ~ empl_17_self</b>                                        | -0.077 | 0.096 | -0.264 | 0.111  |  |  |  |  |  |  |  |  |  |  |  |  |  |  |  |
| <b>s ~ empl_17_sick</b>                                        | -0.800 | 0.225 | -1.240 | -0.360 |  |  |  |  |  |  |  |  |  |  |  |  |  |  |  |
| <b>s ~ empl_17_student</b>                                     | -0.067 | 0.143 | -0.347 | 0.212  |  |  |  |  |  |  |  |  |  |  |  |  |  |  |  |
| <b>s ~ empl_17_unemployed</b>                                  | -0.482 | 0.145 | -0.765 | -0.198 |  |  |  |  |  |  |  |  |  |  |  |  |  |  |  |
| <b>s ~ empl_18_maternity</b>                                   | 0.303  | 0.132 | 0.044  | 0.562  |  |  |  |  |  |  |  |  |  |  |  |  |  |  |  |
| <b>s ~ empl_18_retired</b>                                     | 0.058  | 0.101 | -0.140 | 0.256  |  |  |  |  |  |  |  |  |  |  |  |  |  |  |  |
| <b>s ~ empl_18_self</b>                                        | 0.100  | 0.128 | -0.150 | 0.350  |  |  |  |  |  |  |  |  |  |  |  |  |  |  |  |
| <b>s ~ empl_18_sick</b>                                        | -0.011 | 0.235 | -0.472 | 0.451  |  |  |  |  |  |  |  |  |  |  |  |  |  |  |  |
| <b>s ~ empl_18_student</b>                                     | 0.157  | 0.180 | -0.196 | 0.510  |  |  |  |  |  |  |  |  |  |  |  |  |  |  |  |
| <b>s ~ empl_18_unemployed</b>                                  | 0.528  | 0.172 | 0.191  | 0.864  |  |  |  |  |  |  |  |  |  |  |  |  |  |  |  |
| <b>s ~ empl_maternity</b>                                      | 0.090  | 0.138 | -0.180 | 0.359  |  |  |  |  |  |  |  |  |  |  |  |  |  |  |  |
| <b>s ~ empl_retired</b>                                        | -0.039 | 0.087 | -0.208 | 0.131  |  |  |  |  |  |  |  |  |  |  |  |  |  |  |  |
| <b>s ~ empl_self</b>                                           | -0.019 | 0.107 | -0.228 | 0.191  |  |  |  |  |  |  |  |  |  |  |  |  |  |  |  |
| <b>s ~ empl_sick</b>                                           | 1.378  | 0.234 | 0.918  | 1.838  |  |  |  |  |  |  |  |  |  |  |  |  |  |  |  |
| <b>s ~ empl_student</b>                                        | -0.362 | 0.167 | -0.690 | -0.035 |  |  |  |  |  |  |  |  |  |  |  |  |  |  |  |
| <b>s ~ empl_unemployed</b>                                     | 0.337  | 0.161 | 0.021  | 0.653  |  |  |  |  |  |  |  |  |  |  |  |  |  |  |  |
| <b>s ~ FinancialUncertainty2016</b>                            | -0.321 | 0.066 | -0.450 | -0.192 |  |  |  |  |  |  |  |  |  |  |  |  |  |  |  |
| <b>s ~ FinancialHardship2017to2019_Constant_uncertainty</b>    | 0.813  | 0.107 | 0.604  | 1.023  |  |  |  |  |  |  |  |  |  |  |  |  |  |  |  |
| <b>s ~ FinancialHardship2017to2019_b+3_uncertainty</b>         | 0.436  | 0.076 | 0.287  | 0.584  |  |  |  |  |  |  |  |  |  |  |  |  |  |  |  |
| <b>s ~ FinancialHardship2017to2019_b+1 and b+3_uncertainty</b> | 0.346  | 0.139 | 0.073  | 0.618  |  |  |  |  |  |  |  |  |  |  |  |  |  |  |  |
| <b>s ~ FinancialHardship2017to2019_b+1_uncertainty</b>         | 0.154  | 0.069 | 0.018  | 0.289  |  |  |  |  |  |  |  |  |  |  |  |  |  |  |  |
| <b>s ~ FinancialHardship2017to2019_b+1 and b+2_uncertainty</b> | 0.216  | 0.106 | 0.008  | 0.423  |  |  |  |  |  |  |  |  |  |  |  |  |  |  |  |
| <b>s ~ FinancialHardship2017to2019_b+2 and b+3_uncertainty</b> | 0.544  | 0.113 | 0.322  | 0.766  |  |  |  |  |  |  |  |  |  |  |  |  |  |  |  |
| <b>s ~ FinancialHardship2017to2019_b+2_uncertainty</b>         | 0.249  | 0.070 | 0.111  | 0.387  |  |  |  |  |  |  |  |  |  |  |  |  |  |  |  |
| <b>s ~ FinancialHardship2016</b>                               | -0.677 | 0.060 | -0.794 | -0.560 |  |  |  |  |  |  |  |  |  |  |  |  |  |  |  |
| <b>s ~ FinancialHardship2017to2019_Constant_hardship</b>       | 0.802  | 0.069 | 0.668  | 0.937  |  |  |  |  |  |  |  |  |  |  |  |  |  |  |  |
| <b>s ~ FinancialHardship2017to2019_b+3_hardship</b>            | 0.703  | 0.089 | 0.528  | 0.878  |  |  |  |  |  |  |  |  |  |  |  |  |  |  |  |
| <b>s ~ FinancialHardship2017to2019_b+1 and b+3_hardship</b>    | 0.474  | 0.115 | 0.249  | 0.698  |  |  |  |  |  |  |  |  |  |  |  |  |  |  |  |
| <b>s ~ FinancialHardship2017to2019_b+1_hardship</b>            | 0.111  | 0.068 | -0.022 | 0.244  |  |  |  |  |  |  |  |  |  |  |  |  |  |  |  |
| <b>s ~ FinancialHardship2017to2019_b+1 and b+2_hardship</b>    | 0.258  | 0.097 | 0.069  | 0.447  |  |  |  |  |  |  |  |  |  |  |  |  |  |  |  |
| <b>s ~ FinancialHardship2017to2019_b+2 and b+3_hardship</b>    | 0.756  | 0.087 | 0.586  | 0.926  |  |  |  |  |  |  |  |  |  |  |  |  |  |  |  |
| <b>s ~ FinancialHardship2017to2019_b+2_hardship</b>            | 0.350  | 0.074 | 0.204  | 0.496  |  |  |  |  |  |  |  |  |  |  |  |  |  |  |  |
| <b>s ~ IMD_1</b>                                               | -0.011 | 0.065 | -0.140 | 0.117  |  |  |  |  |  |  |  |  |  |  |  |  |  |  |  |
| <b>s ~ IMD_2</b>                                               | -0.030 | 0.059 | -0.146 | 0.087  |  |  |  |  |  |  |  |  |  |  |  |  |  |  |  |
| <b>s ~ IMD_4</b>                                               | 0.083  | 0.054 | -0.023 | 0.188  |  |  |  |  |  |  |  |  |  |  |  |  |  |  |  |
| <b>s ~ IMD_5</b>                                               | 0.041  | 0.052 | -0.061 | 0.143  |  |  |  |  |  |  |  |  |  |  |  |  |  |  |  |
| <b>s ~ isced</b>                                               | -0.163 | 0.051 | -0.262 | -0.064 |  |  |  |  |  |  |  |  |  |  |  |  |  |  |  |
| <b>s ~ own_mortgage</b>                                        | -0.023 | 0.048 | -0.117 | 0.071  |  |  |  |  |  |  |  |  |  |  |  |  |  |  |  |
| <b>s ~ own_rent</b>                                            | 0.040  | 0.060 | -0.078 | 0.158  |  |  |  |  |  |  |  |  |  |  |  |  |  |  |  |
| <b>s ~ save</b>                                                | -0.062 | 0.038 | -0.137 | 0.014  |  |  |  |  |  |  |  |  |  |  |  |  |  |  |  |
| <b>s ~ sex_female</b>                                          | -0.065 | 0.037 | -0.138 | 0.009  |  |  |  |  |  |  |  |  |  |  |  |  |  |  |  |
| <b>s ~ single</b>                                              | -0.044 | 0.049 | -0.140 | 0.051  |  |  |  |  |  |  |  |  |  |  |  |  |  |  |  |
| <b>s ~ singleandchildren</b>                                   | -0.055 | 0.107 | -0.265 | 0.156  |  |  |  |  |  |  |  |  |  |  |  |  |  |  |  |
| <b>s ~ s</b>                                                   | 0.685  | 0.090 | 0.508  | 0.862  |  |  |  |  |  |  |  |  |  |  |  |  |  |  |  |

Supplementary file S.6. LGM results for cohort 2 (2019-2022)

| <b>Financial hardship (cross-sectional baseline weight)</b> |                       |       |          |          |                           |       |          |          |                        |       |          |          |            |       |          |          |
|-------------------------------------------------------------|-----------------------|-------|----------|----------|---------------------------|-------|----------|----------|------------------------|-------|----------|----------|------------|-------|----------|----------|
| term                                                        | Employment adjustment |       |          |          | Socio-economic adjustment |       |          |          | Demographic adjustment |       |          |          | Unadjusted |       |          |          |
|                                                             | Estimate              | SE    | CI lower | CI upper | Estimate                  | SE    | CI lower | CI upper | Estimate               | SE    | CI lower | CI upper | Estimate   | SE    | CI lower | CI upper |
| ghq ~~ ghq                                                  | 10.953                | 0.483 | 10.006   | 11.900   | 11.185                    | 0.499 | 10.208   | 12.162   | 11.334                 | 0.455 | 10.442   | 12.226   | 11.201     | 0.426 | 10.365   | 12.036   |
| ghq_20 ~~ ghq_20                                            | 14.117                | 0.425 | 13.283   | 14.950   | 14.043                    | 0.426 | 13.208   | 14.878   | 13.983                 | 0.383 | 13.232   | 14.734   | 13.685     | 0.361 | 12.979   | 14.392   |
| ghq_21 ~~ ghq_21                                            | 14.240                | 0.393 | 13.469   | 15.011   | 14.152                    | 0.394 | 13.379   | 14.925   | 14.317                 | 0.390 | 13.552   | 15.081   | 14.285     | 0.365 | 13.571   | 15.000   |
| ghq_22 ~~ ghq_22                                            | 10.961                | 0.501 | 9.978    | 11.943   | 11.186                    | 0.510 | 10.187   | 12.185   | 11.566                 | 0.468 | 10.648   | 12.484   | 11.292     | 0.435 | 10.439   | 12.146   |
| i ~ age                                                     | -0.034                | 0.005 | -0.043   | -0.024   | -0.036                    | 0.004 | -0.043   | -0.028   | -0.037                 | 0.003 | -0.043   | -0.031   |            |       |          |          |
| i ~ country_LondonandSouthEngland                           | 0.166                 | 0.103 | -0.036   | 0.368    | 0.140                     | 0.106 | -0.068   | 0.348    | 0.182                  | 0.100 | -0.014   | 0.378    |            |       |          |          |
| i ~ coupleandchildren                                       | -0.310                | 0.133 | -0.571   | -0.049   | -0.384                    | 0.136 | -0.651   | -0.117   | -0.380                 | 0.120 | -0.615   | -0.144   |            |       |          |          |
| i ~ empl_maternity                                          | 0.589                 | 0.328 | -0.055   | 1.233    | 0.324                     | 0.325 | -0.313   | 0.962    | 0.470                  | 0.299 | -0.117   | 1.056    |            |       |          |          |
| i ~ empl_retired                                            | -0.101                | 0.147 | -0.389   | 0.187    |                           |       |          |          |                        |       |          |          |            |       |          |          |
| i ~ empl_self                                               | -0.203                | 0.180 | -0.556   | 0.151    |                           |       |          |          |                        |       |          |          |            |       |          |          |
| i ~ empl_sick                                               | 5.469                 | 0.480 | 4.528    | 6.410    |                           |       |          |          |                        |       |          |          |            |       |          |          |
| i ~ empl_student                                            | -0.064                | 0.268 | -0.590   | 0.462    |                           |       |          |          |                        |       |          |          |            |       |          |          |
| i ~ empl_unemployed                                         | 1.359                 | 0.371 | 0.632    | 2.085    |                           |       |          |          |                        |       |          |          |            |       |          |          |
| i ~ FinancialHardship2019                                   | 2.939                 | 0.143 | 2.658    | 3.220    | 3.236                     | 0.146 | 2.950    | 3.523    | 3.475                  | 0.131 | 3.219    | 3.731    | 3.682      | 0.122 | 3.443    | 3.921    |
| i ~ IMD_1                                                   | -0.229                | 0.184 | -0.591   | 0.133    | -0.068                    | 0.194 | -0.447   | 0.312    |                        |       |          |          |            |       |          |          |
| i ~ IMD_2                                                   | 0.129                 | 0.162 | -0.189   | 0.447    | 0.173                     | 0.167 | -0.154   | 0.499    |                        |       |          |          |            |       |          |          |
| i ~ IMD_4                                                   | 0.091                 | 0.143 | -0.191   | 0.372    | 0.103                     | 0.147 | -0.185   | 0.390    |                        |       |          |          |            |       |          |          |
| i ~ IMD_5                                                   | 0.048                 | 0.138 | -0.222   | 0.319    | 0.058                     | 0.140 | -0.217   | 0.333    |                        |       |          |          |            |       |          |          |
| i ~ isced                                                   | 0.120                 | 0.135 | -0.145   | 0.385    | 0.083                     | 0.136 | -0.183   | 0.349    | -0.067                 | 0.125 | -0.312   | 0.179    |            |       |          |          |
| i ~ own_mortgage                                            | -0.024                | 0.129 | -0.276   | 0.229    | 0.008                     | 0.128 | -0.243   | 0.258    |                        |       |          |          |            |       |          |          |
| i ~ own_rent                                                | 0.444                 | 0.167 | 0.116    | 0.772    | 0.796                     | 0.171 | 0.460    | 1.132    |                        |       |          |          |            |       |          |          |
| i ~ save                                                    | -0.093                | 0.102 | -0.294   | 0.108    | -0.188                    | 0.103 | -0.391   | 0.014    |                        |       |          |          |            |       |          |          |
| i ~ sex_female                                              | 1.004                 | 0.101 | 0.806    | 1.201    | 1.003                     | 0.103 | 0.800    | 1.205    | 1.065                  | 0.094 | 0.880    | 1.250    |            |       |          |          |
| i ~ single                                                  | 0.132                 | 0.139 | -0.140   | 0.405    | 0.273                     | 0.144 | -0.008   | 0.554    | 0.490                  | 0.129 | 0.237    | 0.742    |            |       |          |          |
| i ~ singleandchildren                                       | -0.248                | 0.306 | -0.847   | 0.352    | -0.204                    | 0.317 | -0.826   | 0.418    | 0.024                  | 0.280 | -0.524   | 0.573    |            |       |          |          |
| i ~ i                                                       | 13.344                | 0.495 | 12.374   | 14.315   | 14.292                    | 0.528 | 13.258   | 15.326   | 14.425                 | 0.486 | 13.472   | 15.378   | 15.307     | 0.463 | 14.400   | 16.214   |
| i ~ s                                                       | -0.709                | 0.174 | -1.050   | -0.368   | -0.770                    | 0.181 | -1.125   | -0.415   | -0.791                 | 0.166 | -1.117   | -0.466   | -0.803     | 0.156 | -1.108   | -0.497   |
| s ~ age                                                     | 0.000                 | 0.002 | -0.003   | 0.004    | 0.000                     | 0.001 | -0.003   | 0.003    | 0.000                  | 0.001 | -0.002   | 0.003    |            |       |          |          |
| s ~ country_LondonandSouthEngland                           | -0.034                | 0.039 | -0.111   | 0.043    | -0.034                    | 0.040 | -0.112   | 0.044    | -0.031                 | 0.037 | -0.104   | 0.042    |            |       |          |          |
| s ~ coupleandchildren                                       | 0.093                 | 0.052 | -0.009   | 0.196    | 0.098                     | 0.052 | -0.005   | 0.201    | 0.068                  | 0.047 | -0.024   | 0.160    |            |       |          |          |
| s ~ empl_20_maternity                                       | -0.077                | 0.146 | -0.364   | 0.209    |                           |       |          |          |                        |       |          |          |            |       |          |          |
| s ~ empl_20_retired                                         | 0.050                 | 0.086 | -0.118   | 0.218    |                           |       |          |          |                        |       |          |          |            |       |          |          |
| s ~ empl_20_self                                            | -0.106                | 0.128 | -0.357   | 0.145    |                           |       |          |          |                        |       |          |          |            |       |          |          |
| s ~ empl_20_sick                                            | -0.885                | 0.218 | -1.311   | -0.458   |                           |       |          |          |                        |       |          |          |            |       |          |          |
| s ~ empl_20_student                                         | 0.003                 | 0.139 | -0.270   | 0.276    |                           |       |          |          |                        |       |          |          |            |       |          |          |
| s ~ empl_20_unemployed                                      | -0.306                | 0.139 | -0.580   | -0.033   |                           |       |          |          |                        |       |          |          |            |       |          |          |
| s ~ empl_21_maternity                                       | 0.190                 | 0.149 | -0.103   | 0.483    |                           |       |          |          |                        |       |          |          |            |       |          |          |
| s ~ empl_21_retired                                         | -0.007                | 0.109 | -0.220   | 0.207    |                           |       |          |          |                        |       |          |          |            |       |          |          |
| s ~ empl_21_self                                            | 0.252                 | 0.140 | -0.023   | 0.526    |                           |       |          |          |                        |       |          |          |            |       |          |          |
| s ~ empl_21_sick                                            | -0.111                | 0.259 | -0.619   | 0.398    |                           |       |          |          |                        |       |          |          |            |       |          |          |
| s ~ empl_21_student                                         | 0.044                 | 0.188 | -0.324   | 0.411    |                           |       |          |          |                        |       |          |          |            |       |          |          |
| s ~ empl_21_unemployed                                      | -0.067                | 0.130 | -0.322   | 0.188    |                           |       |          |          |                        |       |          |          |            |       |          |          |
| s ~ empl_22_maternity                                       | 0.221                 | 0.193 | -0.157   | 0.598    |                           |       |          |          |                        |       |          |          |            |       |          |          |
| s ~ empl_22_retired                                         | 0.026                 | 0.103 | -0.175   | 0.228    |                           |       |          |          |                        |       |          |          |            |       |          |          |
| s ~ empl_22_self                                            | -0.093                | 0.128 | -0.343   | 0.158    |                           |       |          |          |                        |       |          |          |            |       |          |          |
| s ~ empl_22_sick                                            | 0.940                 | 0.278 | 0.395    | 1.486    |                           |       |          |          |                        |       |          |          |            |       |          |          |



|                                                      |        |       |        |        |        |       |        |        |        |       |        |        |        |       |        |        |  |
|------------------------------------------------------|--------|-------|--------|--------|--------|-------|--------|--------|--------|-------|--------|--------|--------|-------|--------|--------|--|
| s ~ empl_22_student                                  | 0.332  | 0.191 | -0.043 | 0.707  |        |       |        |        |        |       |        |        |        |       |        |        |  |
| s ~ empl_22_unemployed                               | 0.653  | 0.152 | 0.355  | 0.951  |        |       |        |        |        |       |        |        |        |       |        |        |  |
| s ~ empl_maternity                                   | -0.282 | 0.145 | -0.566 | 0.002  | -0.143 | 0.115 | -0.369 | 0.083  | -0.179 | 0.106 | -0.387 | 0.029  |        |       |        |        |  |
| s ~ FinancialHardship2019                            | -0.643 | 0.065 | -0.770 | -0.515 | -0.669 | 0.065 | -0.796 | -0.541 | -0.745 | 0.058 | -0.858 | -0.631 | -0.731 | 0.054 | -0.836 | -0.626 |  |
| s ~ FinancialHardship2020to2022_Constant_hardship    | 0.875  | 0.076 | 0.727  | 1.024  | 0.933  | 0.077 | 0.782  | 1.084  | 0.972  | 0.071 | 0.833  | 1.110  | 0.950  | 0.066 | 0.820  | 1.080  |  |
| s ~ FinancialHardship2020to2022_b+3_hardship         | 0.687  | 0.087 | 0.516  | 0.858  | 0.688  | 0.087 | 0.517  | 0.860  | 0.691  | 0.080 | 0.535  | 0.848  | 0.756  | 0.077 | 0.605  | 0.908  |  |
| s ~ FinancialHardship2020to2022_b+1 and b+3_hardship | 0.553  | 0.114 | 0.329  | 0.776  | 0.609  | 0.116 | 0.382  | 0.836  | 0.712  | 0.110 | 0.496  | 0.929  | 0.752  | 0.105 | 0.547  | 0.957  |  |
| s ~ FinancialHardship2020to2022_b+1_hardship         | 0.217  | 0.081 | 0.058  | 0.376  | 0.214  | 0.080 | 0.057  | 0.370  | 0.225  | 0.071 | 0.087  | 0.363  | 0.233  | 0.065 | 0.105  | 0.361  |  |
| s ~ FinancialHardship2020to2022_b+1 and b+2_hardship | 0.259  | 0.100 | 0.064  | 0.455  | 0.223  | 0.098 | 0.030  | 0.415  | 0.242  | 0.089 | 0.068  | 0.417  | 0.309  | 0.083 | 0.147  | 0.471  |  |
| s ~ FinancialHardship2020to2022_b+2 and b+3_hardship | 1.009  | 0.119 | 0.775  | 1.242  | 1.043  | 0.119 | 0.810  | 1.277  | 1.072  | 0.112 | 0.852  | 1.292  | 1.085  | 0.105 | 0.878  | 1.291  |  |
| s ~ FinancialHardship2020to2022_b+2_hardship         | 0.293  | 0.107 | 0.082  | 0.503  | 0.281  | 0.107 | 0.071  | 0.491  | 0.287  | 0.098 | 0.096  | 0.478  | 0.380  | 0.092 | 0.201  | 0.560  |  |
| s ~ IMD_1                                            | 0.073  | 0.069 | -0.062 | 0.208  | 0.068  | 0.070 | -0.069 | 0.205  |        |       |        |        |        |       |        |        |  |
| s ~ IMD_2                                            | 0.087  | 0.064 | -0.039 | 0.212  | 0.090  | 0.064 | -0.036 | 0.216  |        |       |        |        |        |       |        |        |  |
| s ~ IMD_4                                            | -0.015 | 0.055 | -0.122 | 0.092  | -0.023 | 0.055 | -0.130 | 0.085  |        |       |        |        |        |       |        |        |  |
| s ~ IMD_5                                            | -0.011 | 0.053 | -0.115 | 0.092  | -0.009 | 0.053 | -0.113 | 0.095  |        |       |        |        |        |       |        |        |  |
| s ~ isced                                            | 0.109  | 0.056 | -0.001 | 0.220  | 0.095  | 0.057 | -0.016 | 0.206  | 0.121  | 0.052 | 0.020  | 0.223  |        |       |        |        |  |
| s ~ own_mortgage                                     | -0.037 | 0.048 | -0.131 | 0.057  | -0.070 | 0.047 | -0.163 | 0.022  |        |       |        |        |        |       |        |        |  |
| s ~ own_rent                                         | -0.123 | 0.064 | -0.247 | 0.002  | -0.147 | 0.063 | -0.270 | -0.024 |        |       |        |        |        |       |        |        |  |
| s ~ save                                             | 0.123  | 0.039 | 0.046  | 0.200  | 0.118  | 0.039 | 0.041  | 0.195  |        |       |        |        |        |       |        |        |  |
| s ~ sex_female                                       | 0.102  | 0.038 | 0.027  | 0.177  | 0.110  | 0.038 | 0.035  | 0.185  | 0.091  | 0.035 | 0.023  | 0.159  |        |       |        |        |  |
| s ~ single                                           | -0.034 | 0.051 | -0.134 | 0.066  | -0.041 | 0.051 | -0.141 | 0.058  | -0.089 | 0.045 | -0.178 | 0.000  |        |       |        |        |  |
| s ~ singleandchildren                                | -0.005 | 0.119 | -0.239 | 0.228  | 0.013  | 0.119 | -0.220 | 0.247  | -0.006 | 0.107 | -0.216 | 0.204  |        |       |        |        |  |
| s ~ s                                                | 0.842  | 0.094 | 0.658  | 1.026  | 0.831  | 0.096 | 0.643  | 1.019  | 0.818  | 0.087 | 0.647  | 0.989  | 0.824  | 0.081 | 0.664  | 0.983  |  |

### Financial hardship (cross-sectional baseline weight and ipw for attrition)

| term                              | Employment adjustment |       |          |          | Socio-economic adjustment |       |          |          | Demographic adjustment |       |          |          | Unadjusted |       |          |          |
|-----------------------------------|-----------------------|-------|----------|----------|---------------------------|-------|----------|----------|------------------------|-------|----------|----------|------------|-------|----------|----------|
|                                   | Estimate              | SE    | CI lower | CI upper | Estimate                  | SE    | CI lower | CI upper | Estimate               | SE    | CI lower | CI upper | Estimate   | SE    | CI lower | CI upper |
| ghq ~ ghq                         | 11.954                | 0.629 | 10.721   | 13.187   | 12.229                    | 0.647 | 10.961   | 13.497   | 12.237                 | 0.653 | 10.957   | 13.517   | 12.265     | 0.668 | 10.954   | 13.575   |
| ghq_20 ~ ghq_20                   | 15.001                | 0.508 | 14.005   | 15.996   | 14.912                    | 0.507 | 13.918   | 15.906   | 14.923                 | 0.510 | 13.923   | 15.923   | 14.900     | 0.511 | 13.898   | 15.902   |
| ghq_21 ~ ghq_21                   | 14.872                | 0.437 | 14.015   | 15.728   | 14.754                    | 0.440 | 13.891   | 15.617   | 14.756                 | 0.441 | 13.892   | 15.620   | 14.783     | 0.443 | 13.915   | 15.652   |
| ghq_22 ~ ghq_22                   | 11.802                | 0.579 | 10.666   | 12.937   | 12.084                    | 0.591 | 10.926   | 13.242   | 12.049                 | 0.592 | 10.889   | 13.210   | 12.012     | 0.598 | 10.839   | 13.186   |
| i ~ age                           | -0.035                | 0.005 | -0.046   | -0.025   | -0.037                    | 0.004 | -0.045   | -0.028   | -0.040                 | 0.004 | -0.047   | -0.032   |            |       |          |          |
| i ~ country_LondonandSouthEngland | 0.188                 | 0.119 | -0.046   | 0.422    | 0.155                     | 0.124 | -0.087   | 0.397    | 0.175                  | 0.124 | -0.068   | 0.417    |            |       |          |          |
| i ~ coupleandchildren             | -0.341                | 0.148 | -0.631   | -0.051   | -0.415                    | 0.152 | -0.713   | -0.117   | -0.405                 | 0.149 | -0.696   | -0.113   |            |       |          |          |
| i ~ empl_maternity                | 0.832                 | 0.410 | 0.029    | 1.635    | 0.518                     | 0.407 | -0.280   | 1.315    | 0.690                  | 0.410 | -0.113   | 1.493    |            |       |          |          |
| i ~ empl_retired                  | -0.144                | 0.161 | -0.459   | 0.171    |                           |       |          |          |                        |       |          |          |            |       |          |          |
| i ~ empl_self                     | -0.179                | 0.202 | -0.575   | 0.217    |                           |       |          |          |                        |       |          |          |            |       |          |          |
| i ~ empl_sick                     | 5.557                 | 0.527 | 4.523    | 6.591    |                           |       |          |          |                        |       |          |          |            |       |          |          |
| i ~ empl_student                  | -0.086                | 0.305 | -0.684   | 0.513    |                           |       |          |          |                        |       |          |          |            |       |          |          |
| i ~ empl_unemployed               | 1.316                 | 0.421 | 0.491    | 2.141    |                           |       |          |          |                        |       |          |          |            |       |          |          |
| i ~ FinancialHardship2019         | 2.968                 | 0.162 | 2.650    | 3.286    | 3.289                     | 0.165 | 2.966    | 3.611    | 3.552                  | 0.164 | 3.231    | 3.873    | 3.773      | 0.165 | 3.448    | 4.097    |
| i ~ IMD_1                         | -0.226                | 0.209 | -0.635   | 0.183    | -0.073                    | 0.219 | -0.501   | 0.356    |                        |       |          |          |            |       |          |          |
| i ~ IMD_2                         | 0.199                 | 0.186 | -0.164   | 0.563    | 0.243                     | 0.191 | -0.131   | 0.618    |                        |       |          |          |            |       |          |          |
| i ~ IMD_4                         | 0.026                 | 0.159 | -0.286   | 0.338    | 0.037                     | 0.164 | -0.285   | 0.359    |                        |       |          |          |            |       |          |          |
| i ~ IMD_5                         | 0.054                 | 0.151 | -0.242   | 0.350    | 0.067                     | 0.154 | -0.235   | 0.369    |                        |       |          |          |            |       |          |          |
| i ~ isced                         | 0.093                 | 0.145 | -0.191   | 0.378    | 0.047                     | 0.146 | -0.240   | 0.333    | -0.070                 | 0.147 | -0.358   | 0.218    |            |       |          |          |
| i ~ own_mortgage                  | -0.099                | 0.139 | -0.371   | 0.174    | -0.050                    | 0.139 | -0.323   | 0.223    |                        |       |          |          |            |       |          |          |
| i ~ own_rent                      | 0.483                 | 0.177 | 0.136    | 0.831    | 0.863                     | 0.181 | 0.509    | 1.218    |                        |       |          |          |            |       |          |          |
| i ~ save                          | -0.148                | 0.114 | -0.372   | 0.076    | -0.249                    | 0.115 | -0.475   | -0.023   |                        |       |          |          |            |       |          |          |
| i ~ sex_female                    | 1.051                 | 0.117 | 0.821    | 1.280    | 1.043                     | 0.121 | 0.806    | 1.279    | 1.039                  | 0.121 | 0.802    | 1.277    |            |       |          |          |
| i ~ single                        | 0.146                 | 0.157 | -0.161   | 0.453    | 0.304                     | 0.162 | -0.013   | 0.621    | 0.546                  | 0.161 | 0.230    | 0.862    |            |       |          |          |
| i ~ singleandchildren             | -0.284                | 0.345 | -0.961   | 0.393    | -0.249                    | 0.360 | -0.954   | 0.456    | 0.066                  | 0.358 | -0.636   | 0.768    |            |       |          |          |
| i ~ i                             | 14.181                | 0.593 | 13.019   | 15.343   | 15.302                    | 0.623 | 14.081   | 16.523   | 15.463                 | 0.635 | 14.219   | 16.707   | 16.286     | 0.648 | 15.016   | 17.555   |
| i ~ s                             | -0.774                | 0.223 | -1.210   | -0.337   | -0.836                    | 0.228 | -1.283   | -0.390   | -0.860                 | 0.231 | -1.313   | -0.406   | -0.855     | 0.234 | -1.313   | -0.396   |

|                                                      |        |       |        |        |        |       |        |        |        |       |        |        |        |       |        |        |
|------------------------------------------------------|--------|-------|--------|--------|--------|-------|--------|--------|--------|-------|--------|--------|--------|-------|--------|--------|
| s ~ age                                              | 0.000  | 0.002 | -0.004 | 0.004  | 0.000  | 0.002 | -0.003 | 0.003  | 0.001  | 0.001 | -0.002 | 0.003  |        |       |        |        |
| s ~ country_LondonandSouthEngland                    | -0.033 | 0.046 | -0.122 | 0.057  | -0.031 | 0.046 | -0.122 | 0.059  | -0.035 | 0.046 | -0.124 | 0.055  |        |       |        |        |
| s ~ coupleandchildren                                | 0.100  | 0.058 | -0.012 | 0.213  | 0.103  | 0.058 | -0.011 | 0.216  | 0.078  | 0.056 | -0.032 | 0.189  |        |       |        |        |
| s ~ empl_20_maternity                                | -0.181 | 0.165 | -0.505 | 0.143  |        |       |        |        |        |       |        |        |        |       |        |        |
| s ~ empl_20_retired                                  | 0.014  | 0.095 | -0.172 | 0.201  |        |       |        |        |        |       |        |        |        |       |        |        |
| s ~ empl_20_self                                     | -0.145 | 0.147 | -0.433 | 0.143  |        |       |        |        |        |       |        |        |        |       |        |        |
| s ~ empl_20_sick                                     | -1.039 | 0.243 | -1.516 | -0.562 |        |       |        |        |        |       |        |        |        |       |        |        |
| s ~ empl_20_student                                  | -0.030 | 0.143 | -0.310 | 0.250  |        |       |        |        |        |       |        |        |        |       |        |        |
| s ~ empl_20_unemployed                               | -0.225 | 0.153 | -0.526 | 0.075  |        |       |        |        |        |       |        |        |        |       |        |        |
| s ~ empl_21_maternity                                | 0.209  | 0.168 | -0.119 | 0.538  |        |       |        |        |        |       |        |        |        |       |        |        |
| s ~ empl_21_retired                                  | 0.040  | 0.128 | -0.211 | 0.291  |        |       |        |        |        |       |        |        |        |       |        |        |
| s ~ empl_21_self                                     | 0.316  | 0.157 | 0.009  | 0.623  |        |       |        |        |        |       |        |        |        |       |        |        |
| s ~ empl_21_sick                                     | -0.018 | 0.301 | -0.608 | 0.572  |        |       |        |        |        |       |        |        |        |       |        |        |
| s ~ empl_21_student                                  | -0.013 | 0.192 | -0.390 | 0.364  |        |       |        |        |        |       |        |        |        |       |        |        |
| s ~ empl_21_unemployed                               | -0.055 | 0.141 | -0.331 | 0.222  |        |       |        |        |        |       |        |        |        |       |        |        |
| s ~ empl_22_maternity                                | 0.225  | 0.217 | -0.201 | 0.652  |        |       |        |        |        |       |        |        |        |       |        |        |
| s ~ empl_22_retired                                  | 0.034  | 0.115 | -0.191 | 0.259  |        |       |        |        |        |       |        |        |        |       |        |        |
| s ~ empl_22_self                                     | -0.122 | 0.141 | -0.398 | 0.155  |        |       |        |        |        |       |        |        |        |       |        |        |
| s ~ empl_22_sick                                     | 1.045  | 0.332 | 0.394  | 1.697  |        |       |        |        |        |       |        |        |        |       |        |        |
| s ~ empl_22_student                                  | 0.318  | 0.199 | -0.072 | 0.707  |        |       |        |        |        |       |        |        |        |       |        |        |
| s ~ empl_22_unemployed                               | 0.602  | 0.162 | 0.284  | 0.921  |        |       |        |        |        |       |        |        |        |       |        |        |
| s ~ empl_maternity                                   | -0.330 | 0.174 | -0.671 | 0.010  | -0.228 | 0.142 | -0.506 | 0.049  | -0.263 | 0.142 | -0.542 | 0.016  |        |       |        |        |
| s ~ FinancialHardship2019                            | -0.650 | 0.072 | -0.792 | -0.508 | -0.675 | 0.072 | -0.816 | -0.534 | -0.743 | 0.071 | -0.882 | -0.604 | -0.757 | 0.071 | -0.895 | -0.619 |
| s ~ FinancialHardship2020to2022_Constant_hardship    | 0.890  | 0.082 | 0.728  | 1.051  | 0.956  | 0.084 | 0.791  | 1.122  | 0.949  | 0.086 | 0.782  | 1.117  | 0.935  | 0.086 | 0.765  | 1.104  |
| s ~ FinancialHardship2020to2022_b+3_hardship         | 0.731  | 0.095 | 0.545  | 0.916  | 0.727  | 0.094 | 0.542  | 0.912  | 0.725  | 0.094 | 0.540  | 0.909  | 0.771  | 0.097 | 0.581  | 0.961  |
| s ~ FinancialHardship2020to2022_b+1 and b+3_hardship | 0.547  | 0.124 | 0.303  | 0.791  | 0.610  | 0.125 | 0.365  | 0.854  | 0.604  | 0.126 | 0.357  | 0.850  | 0.614  | 0.125 | 0.368  | 0.860  |
| s ~ FinancialHardship2020to2022_b+1 hardship         | 0.237  | 0.089 | 0.062  | 0.412  | 0.242  | 0.088 | 0.070  | 0.414  | 0.233  | 0.088 | 0.061  | 0.404  | 0.267  | 0.090 | 0.091  | 0.443  |
| s ~ FinancialHardship2020to2022_b+1 and b+2 hardship | 0.270  | 0.113 | 0.049  | 0.492  | 0.242  | 0.111 | 0.025  | 0.460  | 0.235  | 0.112 | 0.017  | 0.454  | 0.249  | 0.113 | 0.028  | 0.470  |
| s ~ FinancialHardship2020to2022_b+2 and b+3 hardship | 1.078  | 0.129 | 0.826  | 1.330  | 1.118  | 0.128 | 0.866  | 1.370  | 1.115  | 0.129 | 0.863  | 1.368  | 1.152  | 0.128 | 0.901  | 1.403  |
| s ~ FinancialHardship2020to2022_b+2 hardship         | 0.274  | 0.116 | 0.047  | 0.501  | 0.256  | 0.117 | 0.027  | 0.484  | 0.245  | 0.117 | 0.016  | 0.473  | 0.300  | 0.118 | 0.068  | 0.531  |
| s ~ IMD_1                                            | 0.090  | 0.075 | -0.058 | 0.238  | 0.086  | 0.077 | -0.064 | 0.236  |        |       |        |        |        |       |        |        |
| s ~ IMD_2                                            | 0.082  | 0.073 | -0.061 | 0.225  | 0.089  | 0.073 | -0.054 | 0.232  |        |       |        |        |        |       |        |        |
| s ~ IMD_4                                            | -0.012 | 0.060 | -0.129 | 0.106  | -0.018 | 0.060 | -0.135 | 0.100  |        |       |        |        |        |       |        |        |
| s ~ IMD_5                                            | -0.001 | 0.057 | -0.112 | 0.110  | 0.002  | 0.057 | -0.109 | 0.113  |        |       |        |        |        |       |        |        |
| s ~ isced                                            | 0.132  | 0.062 | 0.011  | 0.253  | 0.117  | 0.062 | -0.004 | 0.238  | 0.132  | 0.062 | 0.011  | 0.253  |        |       |        |        |
| s ~ own_mortgage                                     | -0.026 | 0.051 | -0.126 | 0.073  | -0.063 | 0.051 | -0.164 | 0.037  |        |       |        |        |        |       |        |        |
| s ~ own_rent                                         | -0.142 | 0.067 | -0.273 | -0.010 | -0.163 | 0.065 | -0.292 | -0.035 |        |       |        |        |        |       |        |        |
| s ~ save                                             | 0.157  | 0.043 | 0.072  | 0.241  | 0.154  | 0.044 | 0.068  | 0.239  |        |       |        |        |        |       |        |        |
| s ~ sex_female                                       | 0.122  | 0.044 | 0.036  | 0.208  | 0.126  | 0.044 | 0.040  | 0.212  | 0.127  | 0.044 | 0.041  | 0.212  |        |       |        |        |
| s ~ single                                           | -0.058 | 0.057 | -0.169 | 0.054  | -0.066 | 0.057 | -0.177 | 0.045  | -0.092 | 0.056 | -0.202 | 0.017  |        |       |        |        |
| s ~ singleandchildren                                | -0.014 | 0.130 | -0.268 | 0.240  | -0.005 | 0.128 | -0.256 | 0.245  | -0.051 | 0.127 | -0.300 | 0.197  |        |       |        |        |
| s ~ s                                                | 0.849  | 0.118 | 0.617  | 1.080  | 0.834  | 0.119 | 0.601  | 1.067  | 0.845  | 0.120 | 0.610  | 1.079  | 0.856  | 0.121 | 0.619  | 1.092  |

### Financial uncertainty (cross-sectional baseline weight)

| term                              | Employment adjustment |       |          |          | Socio-economic adjustment |       |          |          | Demographic adjustment |       |          |          | Unadjusted |       |          |          |
|-----------------------------------|-----------------------|-------|----------|----------|---------------------------|-------|----------|----------|------------------------|-------|----------|----------|------------|-------|----------|----------|
|                                   | Estimate              | SE    | CI lower | CI upper | Estimate                  | SE    | CI lower | CI upper | Estimate               | SE    | CI lower | CI upper | Estimate   | SE    | CI lower | CI upper |
| ghq ~ ghq                         | 10.867                | 0.494 | 9.899    | 11.835   | 11.074                    | 0.509 | 10.077   | 12.071   | 11.271                 | 0.467 | 10.356   | 12.187   | 11.116     | 0.438 | 10.257   | 11.976   |
| ghq_20 ~ ghq_20                   | 13.989                | 0.434 | 13.139   | 14.840   | 13.922                    | 0.435 | 13.069   | 14.775   | 13.822                 | 0.393 | 13.052   | 14.592   | 13.472     | 0.367 | 12.753   | 14.190   |
| ghq_21 ~ ghq_21                   | 13.974                | 0.386 | 13.218   | 14.729   | 13.880                    | 0.386 | 13.123   | 14.636   | 14.007                 | 0.393 | 13.237   | 14.777   | 14.005     | 0.370 | 13.280   | 14.729   |
| ghq_22 ~ ghq_22                   | 10.989                | 0.498 | 10.012   | 11.965   | 11.246                    | 0.507 | 10.253   | 12.240   | 11.730                 | 0.471 | 10.806   | 12.654   | 11.438     | 0.443 | 10.571   | 12.306   |
| i ~ age                           | -0.033                | 0.005 | -0.043   | -0.023   | -0.038                    | 0.004 | -0.046   | -0.030   | -0.044                 | 0.003 | -0.050   | -0.037   |            |       |          |          |
| i ~ country_LondonandSouthEngland | 0.239                 | 0.107 | 0.029    | 0.448    | 0.215                     | 0.110 | -0.001   | 0.431    | 0.229                  | 0.105 | 0.023    | 0.435    |            |       |          |          |

|                                                         |        |       |        |        |  |        |       |        |        |  |        |       |        |        |        |       |        |        |
|---------------------------------------------------------|--------|-------|--------|--------|--|--------|-------|--------|--------|--|--------|-------|--------|--------|--------|-------|--------|--------|
| i ~ coupleandchildren                                   | -0.033 | 0.135 | -0.299 | 0.232  |  | -0.074 | 0.139 | -0.346 | 0.198  |  | 0.048  | 0.124 | -0.194 | 0.290  |        |       |        |        |
| i ~ empl_maternity                                      | 0.384  | 0.329 | -0.261 | 1.030  |  | 0.129  | 0.325 | -0.509 | 0.766  |  | 0.570  | 0.302 | -0.023 | 1.163  |        |       |        |        |
| i ~ empl_retired                                        | -0.355 | 0.151 | -0.652 | -0.059 |  |        |       |        |        |  |        |       |        |        |        |       |        |        |
| i ~ empl_self                                           | -0.194 | 0.185 | -0.556 | 0.168  |  |        |       |        |        |  |        |       |        |        |        |       |        |        |
| i ~ empl_sick                                           | 5.750  | 0.510 | 4.749  | 6.750  |  |        |       |        |        |  |        |       |        |        |        |       |        |        |
| i ~ empl_student                                        | -0.160 | 0.284 | -0.717 | 0.397  |  |        |       |        |        |  |        |       |        |        |        |       |        |        |
| i ~ empl_unemployed                                     | 1.968  | 0.403 | 1.177  | 2.758  |  |        |       |        |        |  |        |       |        |        |        |       |        |        |
| i ~ FinancialUncertainty2019                            | 2.174  | 0.172 | 1.836  | 2.512  |  | 2.353  | 0.179 | 2.002  | 2.705  |  | 2.459  | 0.168 | 2.131  | 2.788  | 2.429  | 0.156 | 2.122  | 2.735  |
| i ~ IMD_1                                               | -0.157 | 0.192 | -0.533 | 0.218  |  | 0.020  | 0.202 | -0.375 | 0.416  |  |        |       |        |        |        |       |        |        |
| i ~ IMD_2                                               | 0.178  | 0.168 | -0.151 | 0.507  |  | 0.217  | 0.173 | -0.122 | 0.556  |  |        |       |        |        |        |       |        |        |
| i ~ IMD_4                                               | -0.039 | 0.146 | -0.325 | 0.247  |  | -0.052 | 0.150 | -0.346 | 0.242  |  |        |       |        |        |        |       |        |        |
| i ~ IMD_5                                               | -0.095 | 0.141 | -0.370 | 0.181  |  | -0.118 | 0.143 | -0.399 | 0.163  |  |        |       |        |        |        |       |        |        |
| i ~ isced                                               | -0.032 | 0.142 | -0.311 | 0.247  |  | -0.066 | 0.142 | -0.345 | 0.213  |  | -0.362 | 0.131 | -0.619 | -0.105 |        |       |        |        |
| i ~ own_mortgage                                        | 0.129  | 0.133 | -0.131 | 0.389  |  | 0.235  | 0.132 | -0.023 | 0.493  |  |        |       |        |        |        |       |        |        |
| i ~ own_rent                                            | 1.008  | 0.172 | 0.672  | 1.344  |  | 1.493  | 0.178 | 1.145  | 1.841  |  |        |       |        |        |        |       |        |        |
| i ~ save                                                | -0.712 | 0.105 | -0.917 | -0.506 |  | -0.878 | 0.107 | -1.087 | -0.669 |  |        |       |        |        |        |       |        |        |
| i ~ sex_female                                          | 1.019  | 0.104 | 0.815  | 1.224  |  | 1.011  | 0.107 | 0.801  | 1.221  |  | 1.056  | 0.099 | 0.862  | 1.250  |        |       |        |        |
| i ~ single                                              | 0.321  | 0.145 | 0.037  | 0.605  |  | 0.484  | 0.149 | 0.191  | 0.776  |  | 0.966  | 0.138 | 0.695  | 1.237  |        |       |        |        |
| i ~ singleandchildren                                   | 0.221  | 0.319 | -0.404 | 0.846  |  | 0.322  | 0.333 | -0.330 | 0.974  |  | 0.973  | 0.297 | 0.391  | 1.554  |        |       |        |        |
| i ~ i                                                   | 14.122 | 0.528 | 13.088 | 15.157 |  | 15.285 | 0.563 | 14.182 | 16.388 |  | 15.872 | 0.538 | 14.818 | 16.927 | 17.122 | 0.518 | 16.106 | 18.137 |
| i ~ s                                                   | -0.858 | 0.184 | -1.219 | -0.498 |  | -0.955 | 0.191 | -1.331 | -0.580 |  | -0.957 | 0.178 | -1.306 | -0.608 | -0.888 | 0.166 | -1.213 | -0.563 |
| s ~ age                                                 | -0.002 | 0.002 | -0.006 | 0.002  |  | -0.002 | 0.001 | -0.005 | 0.000  |  | -0.002 | 0.001 | -0.004 | 0.001  |        |       |        |        |
| s ~ country_LondonandSouthEngland                       | -0.053 | 0.040 | -0.131 | 0.025  |  | -0.051 | 0.040 | -0.130 | 0.028  |  | -0.053 | 0.038 | -0.128 | 0.021  |        |       |        |        |
| s ~ coupleandchildren                                   | 0.086  | 0.053 | -0.018 | 0.190  |  | 0.093  | 0.053 | -0.010 | 0.197  |  | 0.059  | 0.047 | -0.033 | 0.152  |        |       |        |        |
| s ~ empl_20_maternity                                   | -0.110 | 0.148 | -0.399 | 0.180  |  |        |       |        |        |  |        |       |        |        |        |       |        |        |
| s ~ empl_20_retired                                     | 0.096  | 0.088 | -0.077 | 0.269  |  |        |       |        |        |  |        |       |        |        |        |       |        |        |
| s ~ empl_20_self                                        | -0.083 | 0.129 | -0.336 | 0.169  |  |        |       |        |        |  |        |       |        |        |        |       |        |        |
| s ~ empl_20_sick                                        | -1.144 | 0.229 | -1.592 | -0.696 |  |        |       |        |        |  |        |       |        |        |        |       |        |        |
| s ~ empl_20_student                                     | -0.015 | 0.147 | -0.303 | 0.273  |  |        |       |        |        |  |        |       |        |        |        |       |        |        |
| s ~ empl_20_unemployed                                  | -0.311 | 0.147 | -0.598 | -0.023 |  |        |       |        |        |  |        |       |        |        |        |       |        |        |
| s ~ empl_21_maternity                                   | 0.191  | 0.153 | -0.108 | 0.490  |  |        |       |        |        |  |        |       |        |        |        |       |        |        |
| s ~ empl_21_retired                                     | 0.004  | 0.110 | -0.211 | 0.220  |  |        |       |        |        |  |        |       |        |        |        |       |        |        |
| s ~ empl_21_self                                        | 0.283  | 0.140 | 0.010  | 0.557  |  |        |       |        |        |  |        |       |        |        |        |       |        |        |
| s ~ empl_21_sick                                        | -0.073 | 0.259 | -0.581 | 0.434  |  |        |       |        |        |  |        |       |        |        |        |       |        |        |
| s ~ empl_21_student                                     | 0.076  | 0.195 | -0.305 | 0.458  |  |        |       |        |        |  |        |       |        |        |        |       |        |        |
| s ~ empl_21_unemployed                                  | -0.057 | 0.133 | -0.318 | 0.204  |  |        |       |        |        |  |        |       |        |        |        |       |        |        |
| s ~ empl_22_maternity                                   | 0.154  | 0.192 | -0.222 | 0.529  |  |        |       |        |        |  |        |       |        |        |        |       |        |        |
| s ~ empl_22_retired                                     | -0.028 | 0.102 | -0.229 | 0.173  |  |        |       |        |        |  |        |       |        |        |        |       |        |        |
| s ~ empl_22_self                                        | -0.104 | 0.126 | -0.351 | 0.142  |  |        |       |        |        |  |        |       |        |        |        |       |        |        |
| s ~ empl_22_sick                                        | 1.133  | 0.289 | 0.566  | 1.700  |  |        |       |        |        |  |        |       |        |        |        |       |        |        |
| s ~ empl_22_student                                     | 0.335  | 0.195 | -0.047 | 0.717  |  |        |       |        |        |  |        |       |        |        |        |       |        |        |
| s ~ empl_22_unemployed                                  | 0.726  | 0.154 | 0.423  | 1.028  |  |        |       |        |        |  |        |       |        |        |        |       |        |        |
| s ~ empl_maternity                                      | -0.196 | 0.143 | -0.476 | 0.084  |  | -0.099 | 0.115 | -0.324 | 0.125  |  | -0.142 | 0.105 | -0.348 | 0.064  |        |       |        |        |
| s ~ FinancialUncertainty2019                            | -0.346 | 0.065 | -0.473 | -0.219 |  | -0.349 | 0.066 | -0.478 | -0.221 |  | -0.375 | 0.061 | -0.495 | -0.255 | -0.336 | 0.056 | -0.446 | -0.226 |
| s ~ FinancialHardship2020to2022_Constant_uncertainty    | 0.969  | 0.100 | 0.773  | 1.164  |  | 1.000  | 0.103 | 0.799  | 1.201  |  | 0.989  | 0.096 | 0.801  | 1.176  | 0.838  | 0.089 | 0.663  | 1.012  |
| s ~ FinancialHardship2020to2022_b+3_uncertainty         | 0.443  | 0.054 | 0.338  | 0.549  |  | 0.465  | 0.054 | 0.359  | 0.571  |  | 0.434  | 0.051 | 0.334  | 0.534  | 0.393  | 0.049 | 0.297  | 0.490  |
| s ~ FinancialHardship2020to2022_b+1 and b+3_uncertainty | 0.618  | 0.098 | 0.427  | 0.810  |  | 0.619  | 0.100 | 0.423  | 0.815  |  | 0.582  | 0.093 | 0.401  | 0.764  | 0.521  | 0.091 | 0.342  | 0.699  |
| s ~ FinancialHardship2020to2022_b+1_uncertainty         | 0.287  | 0.083 | 0.125  | 0.449  |  | 0.300  | 0.082 | 0.140  | 0.461  |  | 0.287  | 0.075 | 0.140  | 0.434  | 0.261  | 0.071 | 0.121  | 0.401  |

|                                                         |        |       |        |       |        |       |        |       |        |       |        |       |       |       |       |       |
|---------------------------------------------------------|--------|-------|--------|-------|--------|-------|--------|-------|--------|-------|--------|-------|-------|-------|-------|-------|
| s ~ FinancialHardship2020to2022_b+1 and b+2 uncertainty | 0.635  | 0.132 | 0.376  | 0.893 | 0.640  | 0.134 | 0.377  | 0.903 | 0.628  | 0.121 | 0.391  | 0.865 | 0.567 | 0.117 | 0.337 | 0.796 |
| s ~ FinancialHardship2020to2022_b+2 and b+3 uncertainty | 0.810  | 0.104 | 0.605  | 1.014 | 0.808  | 0.105 | 0.602  | 1.015 | 0.832  | 0.099 | 0.637  | 1.027 | 0.764 | 0.093 | 0.582 | 0.945 |
| s ~ FinancialHardship2020to2022_b+2 uncertainty         | 0.512  | 0.088 | 0.339  | 0.684 | 0.523  | 0.089 | 0.349  | 0.698 | 0.530  | 0.079 | 0.374  | 0.685 | 0.466 | 0.072 | 0.324 | 0.608 |
| s ~ IMD_1                                               | 0.106  | 0.070 | -0.031 | 0.243 | 0.103  | 0.071 | -0.036 | 0.242 |        |       |        |       |       |       |       |       |
| s ~ IMD_2                                               | 0.091  | 0.064 | -0.035 | 0.218 | 0.099  | 0.065 | -0.028 | 0.226 |        |       |        |       |       |       |       |       |
| s ~ IMD_4                                               | -0.003 | 0.055 | -0.112 | 0.106 | -0.008 | 0.056 | -0.117 | 0.102 |        |       |        |       |       |       |       |       |
| s ~ IMD_5                                               | -0.022 | 0.053 | -0.126 | 0.083 | -0.018 | 0.053 | -0.123 | 0.086 |        |       |        |       |       |       |       |       |
| s ~ isced                                               | 0.091  | 0.057 | -0.021 | 0.203 | 0.075  | 0.057 | -0.037 | 0.188 | 0.090  | 0.053 | -0.013 | 0.194 |       |       |       |       |
| s ~ own_mortgage                                        | -0.039 | 0.048 | -0.134 | 0.056 | -0.072 | 0.048 | -0.166 | 0.022 |        |       |        |       |       |       |       |       |
| s ~ own_rent                                            | -0.078 | 0.064 | -0.204 | 0.047 | -0.102 | 0.063 | -0.226 | 0.022 |        |       |        |       |       |       |       |       |
| s ~ save                                                | 0.134  | 0.038 | 0.060  | 0.209 | 0.127  | 0.038 | 0.052  | 0.202 |        |       |        |       |       |       |       |       |
| s ~ sex_female                                          | 0.102  | 0.039 | 0.026  | 0.178 | 0.105  | 0.039 | 0.029  | 0.181 | 0.088  | 0.035 | 0.018  | 0.157 |       |       |       |       |
| s ~ single                                              | -0.054 | 0.052 | -0.155 | 0.048 | -0.060 | 0.052 | -0.161 | 0.041 | -0.089 | 0.046 | -0.179 | 0.002 |       |       |       |       |
| s ~ singleandchildren                                   | -0.037 | 0.117 | -0.267 | 0.194 | -0.014 | 0.117 | -0.243 | 0.215 | 0.010  | 0.104 | -0.194 | 0.214 |       |       |       |       |
| s ~ s                                                   | 0.862  | 0.097 | 0.673  | 1.052 | 0.859  | 0.098 | 0.667  | 1.052 | 0.832  | 0.090 | 0.655  | 1.009 | 0.826 | 0.084 | 0.662 | 0.990 |

**Financial uncertainty (cross-sectional baseline weight and ipw for attrition)**

| term                              | Employment adjustment |       |          |          | Socio-economic adjustment |       |          |          | Demographic adjustment |       |          |          | Unadjusted |       |          |          |
|-----------------------------------|-----------------------|-------|----------|----------|---------------------------|-------|----------|----------|------------------------|-------|----------|----------|------------|-------|----------|----------|
|                                   | Estimate              | SE    | CI lower | CI upper | Estimate                  | SE    | CI lower | CI upper | Estimate               | SE    | CI lower | CI upper | Estimate   | SE    | CI lower | CI upper |
| ghq ~ ghq                         | 11.903                | 0.640 | 10.648   | 13.158   | 12.172                    | 0.657 | 10.883   | 13.461   | 12.247                 | 0.670 | 10.933   | 13.560   | 12.297     | 0.689 | 10.946   | 13.647   |
| ghq_20 ~ ghq_20                   | 14.886                | 0.517 | 13.872   | 15.900   | 14.796                    | 0.517 | 13.783   | 15.809   | 14.789                 | 0.524 | 13.763   | 15.816   | 14.759     | 0.527 | 13.726   | 15.791   |
| ghq_21 ~ ghq_21                   | 14.645                | 0.430 | 13.802   | 15.487   | 14.526                    | 0.432 | 13.680   | 15.372   | 14.489                 | 0.432 | 13.642   | 15.335   | 14.510     | 0.435 | 13.657   | 15.363   |
| ghq_22 ~ ghq_22                   | 11.828                | 0.581 | 10.689   | 12.966   | 12.129                    | 0.591 | 10.971   | 13.286   | 12.147                 | 0.596 | 10.978   | 13.316   | 12.117     | 0.609 | 10.922   | 13.311   |
| i ~ age                           | -0.033                | 0.006 | -0.044   | -0.022   | -0.038                    | 0.004 | -0.047   | -0.029   | -0.045                 | 0.004 | -0.053   | -0.037   |            |       |          |          |
| i ~ country_LondonandSouthEngland | 0.249                 | 0.124 | 0.005    | 0.492    | 0.220                     | 0.129 | -0.033   | 0.473    | 0.197                  | 0.131 | -0.060   | 0.454    |            |       |          |          |
| i ~ coupleandchildren             | -0.066                | 0.151 | -0.363   | 0.230    | -0.104                    | 0.155 | -0.409   | 0.200    | 0.108                  | 0.154 | -0.195   | 0.410    |            |       |          |          |
| i ~ empl_maternity                | 0.641                 | 0.407 | -0.157   | 1.440    | 0.343                     | 0.403 | -0.446   | 1.132    | 0.810                  | 0.409 | 0.009    | 1.611    |            |       |          |          |
| i ~ empl_retired                  | -0.454                | 0.167 | -0.782   | -0.127   |                           |       |          |          |                        |       |          |          |            |       |          |          |
| i ~ empl_self                     | -0.168                | 0.206 | -0.573   | 0.237    |                           |       |          |          |                        |       |          |          |            |       |          |          |
| i ~ empl_sick                     | 5.789                 | 0.558 | 4.695    | 6.883    |                           |       |          |          |                        |       |          |          |            |       |          |          |
| i ~ empl_student                  | -0.278                | 0.323 | -0.911   | 0.355    |                           |       |          |          |                        |       |          |          |            |       |          |          |
| i ~ empl_unemployed               | 1.877                 | 0.450 | 0.995    | 2.759    |                           |       |          |          |                        |       |          |          |            |       |          |          |
| i ~ FinancialUncertainty2019      | 2.123                 | 0.189 | 1.753    | 2.493    | 2.337                     | 0.199 | 1.946    | 2.727    | 2.331                  | 0.201 | 1.937    | 2.726    | 2.209      | 0.203 | 1.812    | 2.606    |
| i ~ IMD_1                         | -0.162                | 0.217 | -0.587   | 0.264    | 0.020                     | 0.229 | -0.428   | 0.468    |                        |       |          |          |            |       |          |          |
| i ~ IMD_2                         | 0.220                 | 0.192 | -0.157   | 0.596    | 0.256                     | 0.198 | -0.133   | 0.645    |                        |       |          |          |            |       |          |          |
| i ~ IMD_4                         | -0.084                | 0.162 | -0.401   | 0.233    | -0.086                    | 0.167 | -0.414   | 0.242    |                        |       |          |          |            |       |          |          |
| i ~ IMD_5                         | -0.102                | 0.154 | -0.403   | 0.200    | -0.123                    | 0.157 | -0.431   | 0.185    |                        |       |          |          |            |       |          |          |
| i ~ isced                         | -0.059                | 0.152 | -0.358   | 0.239    | -0.097                    | 0.153 | -0.397   | 0.204    | -0.408                 | 0.158 | -0.717   | -0.099   |            |       |          |          |
| i ~ own_mortgage                  | 0.080                 | 0.143 | -0.199   | 0.360    | 0.236                     | 0.143 | -0.045   | 0.517    |                        |       |          |          |            |       |          |          |
| i ~ own_rent                      | 1.064                 | 0.183 | 0.706    | 1.422    | 1.612                     | 0.188 | 1.244    | 1.980    |                        |       |          |          |            |       |          |          |
| i ~ save                          | -0.815                | 0.116 | -1.043   | -0.587   | -0.992                    | 0.119 | -1.225   | -0.760   |                        |       |          |          |            |       |          |          |
| i ~ sex_female                    | 1.065                 | 0.122 | 0.826    | 1.304    | 1.048                     | 0.126 | 0.801    | 1.295    | 1.034                  | 0.129 | 0.781    | 1.286    |            |       |          |          |
| i ~ single                        | 0.365                 | 0.164 | 0.045    | 0.686    | 0.559                     | 0.169 | 0.228    | 0.890    | 1.139                  | 0.174 | 0.797    | 1.481    |            |       |          |          |
| i ~ singleandchildren             | 0.142                 | 0.359 | -0.561   | 0.844    | 0.230                     | 0.375 | -0.506   | 0.965    | 1.070                  | 0.377 | 0.331    | 1.809    |            |       |          |          |
| i ~ i                             | 15.114                | 0.646 | 13.849   | 16.379   | 16.498                    | 0.678 | 15.170   | 17.827   | 17.256                 | 0.725 | 15.834   | 18.677   | 18.584     | 0.762 | 17.091   | 20.077   |
| i ~ s                             | -0.939                | 0.239 | -1.407   | -0.471   | -1.040                    | 0.244 | -1.518   | -0.562   | -1.076                 | 0.253 | -1.573   | -0.579   | -1.017     | 0.258 | -1.522   | -0.511   |

|                                                         |        |       |        |        |  |        |       |        |        |  |        |       |        |        |  |        |       |        |        |
|---------------------------------------------------------|--------|-------|--------|--------|--|--------|-------|--------|--------|--|--------|-------|--------|--------|--|--------|-------|--------|--------|
| s ~ age                                                 | -0.002 | 0.002 | -0.006 | 0.002  |  | -0.002 | 0.002 | -0.005 | 0.001  |  | -0.002 | 0.001 | -0.005 | 0.001  |  |        |       |        |        |
| s ~ country_LondonandSouthEngland                       | -0.044 | 0.046 | -0.134 | 0.046  |  | -0.040 | 0.047 | -0.132 | 0.051  |  | -0.047 | 0.046 | -0.137 | 0.043  |  |        |       |        |        |
| s ~ coupleandchildren                                   | 0.095  | 0.059 | -0.020 | 0.210  |  | 0.101  | 0.059 | -0.014 | 0.216  |  | 0.064  | 0.057 | -0.048 | 0.177  |  |        |       |        |        |
| s ~ empl_20_maternity                                   | -0.190 | 0.165 | -0.513 | 0.133  |  |        |       |        |        |  |        |       |        |        |  |        |       |        |        |
| s ~ empl_20_retired                                     | 0.078  | 0.098 | -0.113 | 0.270  |  |        |       |        |        |  |        |       |        |        |  |        |       |        |        |
| s ~ empl_20_self                                        | -0.102 | 0.144 | -0.385 | 0.181  |  |        |       |        |        |  |        |       |        |        |  |        |       |        |        |
| s ~ empl_20_sick                                        | -1.151 | 0.253 | -1.647 | -0.656 |  |        |       |        |        |  |        |       |        |        |  |        |       |        |        |
| s ~ empl_20_student                                     | -0.072 | 0.150 | -0.366 | 0.223  |  |        |       |        |        |  |        |       |        |        |  |        |       |        |        |
| s ~ empl_20_unemployed                                  | -0.217 | 0.162 | -0.534 | 0.100  |  |        |       |        |        |  |        |       |        |        |  |        |       |        |        |
| s ~ empl_21_maternity                                   | 0.207  | 0.168 | -0.123 | 0.536  |  |        |       |        |        |  |        |       |        |        |  |        |       |        |        |
| s ~ empl_21_retired                                     | 0.043  | 0.128 | -0.208 | 0.294  |  |        |       |        |        |  |        |       |        |        |  |        |       |        |        |
| s ~ empl_21_self                                        | 0.327  | 0.153 | 0.027  | 0.626  |  |        |       |        |        |  |        |       |        |        |  |        |       |        |        |
| s ~ empl_21_sick                                        | -0.014 | 0.296 | -0.594 | 0.566  |  |        |       |        |        |  |        |       |        |        |  |        |       |        |        |
| s ~ empl_21_student                                     | 0.060  | 0.201 | -0.333 | 0.453  |  |        |       |        |        |  |        |       |        |        |  |        |       |        |        |
| s ~ empl_21_unemployed                                  | -0.032 | 0.143 | -0.313 | 0.249  |  |        |       |        |        |  |        |       |        |        |  |        |       |        |        |
| s ~ empl_22_maternity                                   | 0.176  | 0.217 | -0.249 | 0.600  |  |        |       |        |        |  |        |       |        |        |  |        |       |        |        |
| s ~ empl_22_retired                                     | -0.028 | 0.114 | -0.251 | 0.194  |  |        |       |        |        |  |        |       |        |        |  |        |       |        |        |
| s ~ empl_22_self                                        | -0.133 | 0.137 | -0.401 | 0.136  |  |        |       |        |        |  |        |       |        |        |  |        |       |        |        |
| s ~ empl_22_sick                                        | 1.091  | 0.339 | 0.427  | 1.755  |  |        |       |        |        |  |        |       |        |        |  |        |       |        |        |
| s ~ empl_22_student                                     | 0.279  | 0.201 | -0.115 | 0.674  |  |        |       |        |        |  |        |       |        |        |  |        |       |        |        |
| s ~ empl_22_unemployed                                  | 0.671  | 0.160 | 0.358  | 0.985  |  |        |       |        |        |  |        |       |        |        |  |        |       |        |        |
| s ~ empl_maternity                                      | -0.258 | 0.167 | -0.586 | 0.069  |  | -0.175 | 0.135 | -0.440 | 0.090  |  | -0.204 | 0.135 | -0.468 | 0.060  |  |        |       |        |        |
| s ~ FinancialUncertainty2019                            | -0.329 | 0.072 | -0.470 | -0.188 |  | -0.334 | 0.073 | -0.478 | -0.191 |  | -0.334 | 0.073 | -0.477 | -0.190 |  | -0.311 | 0.073 | -0.454 | -0.167 |
| s ~ FinancialHardship2020to2022_Constant_uncertainty    | 1.037  | 0.111 | 0.821  | 1.254  |  | 1.082  | 0.116 | 0.854  | 1.310  |  | 1.067  | 0.118 | 0.836  | 1.298  |  | 0.936  | 0.119 | 0.703  | 1.170  |
| s ~ FinancialHardship2020to2022_b+3_uncertainty         | 0.473  | 0.059 | 0.357  | 0.588  |  | 0.507  | 0.059 | 0.391  | 0.623  |  | 0.506  | 0.060 | 0.388  | 0.624  |  | 0.452  | 0.061 | 0.333  | 0.572  |
| s ~ FinancialHardship2020to2022_b+1 and b+3_uncertainty | 0.646  | 0.107 | 0.437  | 0.855  |  | 0.654  | 0.112 | 0.434  | 0.873  |  | 0.638  | 0.113 | 0.416  | 0.860  |  | 0.563  | 0.115 | 0.337  | 0.790  |
| s ~ FinancialHardship2020to2022_b+1_uncertainty         | 0.317  | 0.096 | 0.129  | 0.505  |  | 0.328  | 0.095 | 0.143  | 0.514  |  | 0.314  | 0.096 | 0.126  | 0.503  |  | 0.298  | 0.099 | 0.103  | 0.493  |
| s ~ FinancialHardship2020to2022_b+1 and b+2_uncertainty | 0.750  | 0.148 | 0.460  | 1.040  |  | 0.753  | 0.151 | 0.456  | 1.049  |  | 0.742  | 0.153 | 0.441  | 1.043  |  | 0.720  | 0.157 | 0.412  | 1.027  |
| s ~ FinancialHardship2020to2022_b+2 and b+3_uncertainty | 0.829  | 0.117 | 0.600  | 1.057  |  | 0.830  | 0.117 | 0.602  | 1.059  |  | 0.829  | 0.116 | 0.601  | 1.056  |  | 0.754  | 0.115 | 0.528  | 0.979  |
| s ~ FinancialHardship2020to2022_b+2_uncertainty         | 0.483  | 0.106 | 0.275  | 0.690  |  | 0.493  | 0.109 | 0.280  | 0.707  |  | 0.476  | 0.107 | 0.265  | 0.686  |  | 0.442  | 0.109 | 0.228  | 0.656  |
| s ~ IMD_1                                               | 0.124  | 0.077 | -0.026 | 0.274  |  | 0.123  | 0.078 | -0.030 | 0.275  |  |        |       |        |        |  |        |       |        |        |
| s ~ IMD_2                                               | 0.093  | 0.073 | -0.051 | 0.237  |  | 0.103  | 0.074 | -0.041 | 0.248  |  |        |       |        |        |  |        |       |        |        |
| s ~ IMD_4                                               | 0.002  | 0.061 | -0.118 | 0.121  |  | -0.002 | 0.061 | -0.122 | 0.117  |  |        |       |        |        |  |        |       |        |        |
| s ~ IMD_5                                               | -0.011 | 0.057 | -0.124 | 0.101  |  | -0.007 | 0.057 | -0.120 | 0.105  |  |        |       |        |        |  |        |       |        |        |
| s ~ isced                                               | 0.104  | 0.062 | -0.019 | 0.226  |  | 0.089  | 0.063 | -0.034 | 0.211  |  | 0.102  | 0.063 | -0.022 | 0.225  |  |        |       |        |        |
| s ~ own_mortgage                                        | -0.035 | 0.051 | -0.136 | 0.065  |  | -0.072 | 0.052 | -0.173 | 0.029  |  |        |       |        |        |  |        |       |        |        |
| s ~ own_rent                                            | -0.102 | 0.068 | -0.235 | 0.032  |  | -0.121 | 0.066 | -0.250 | 0.009  |  |        |       |        |        |  |        |       |        |        |
| s ~ save                                                | 0.167  | 0.042 | 0.085  | 0.248  |  | 0.159  | 0.042 | 0.075  | 0.242  |  |        |       |        |        |  |        |       |        |        |
| s ~ sex_female                                          | 0.120  | 0.045 | 0.033  | 0.207  |  | 0.119  | 0.045 | 0.032  | 0.206  |  | 0.119  | 0.045 | 0.031  | 0.206  |  |        |       |        |        |
| s ~ single                                              | -0.079 | 0.057 | -0.192 | 0.034  |  | -0.086 | 0.057 | -0.199 | 0.026  |  | -0.107 | 0.056 | -0.217 | 0.004  |  |        |       |        |        |
| s ~ singleandchildren                                   | -0.018 | 0.126 | -0.266 | 0.230  |  | -0.001 | 0.124 | -0.245 | 0.243  |  | -0.043 | 0.122 | -0.283 | 0.196  |  |        |       |        |        |
| s ~ s                                                   | 0.876  | 0.123 | 0.636  | 1.117  |  | 0.866  | 0.123 | 0.625  | 1.107  |  | 0.867  | 0.124 | 0.623  | 1.111  |  | 0.868  | 0.126 | 0.621  | 1.114  |

## Financial hardship and uncertainty (cross-sectional baseline)

| term                              | Employment adjustment |       |          |          |
|-----------------------------------|-----------------------|-------|----------|----------|
|                                   | Estimate              | SE    | CI lower | CI upper |
| ghq ~~ ghq                        | 10.778                | 0.487 | 9.824    | 11.732   |
| ghq_20 ~~ ghq_20                  | 14.051                | 0.431 | 13.207   | 14.896   |
| ghq_21 ~~ ghq_21                  | 14.024                | 0.387 | 13.266   | 14.783   |
| ghq_22 ~~ ghq_22                  | 10.874                | 0.494 | 9.906    | 11.841   |
| i ~ age                           | -0.035                | 0.005 | -0.044   | -0.025   |
| i ~ country_LondonandSouthEngland | 0.213                 | 0.104 | 0.009    | 0.417    |
| i ~ coupleandchildren             | -0.281                | 0.133 | -0.542   | -0.020   |
| i ~ empl_maternity                | 0.428                 | 0.325 | -0.210   | 1.065    |
| i ~ empl_retired                  | -0.117                | 0.146 | -0.404   | 0.170    |
| i ~ empl_self                     | -0.211                | 0.180 | -0.563   | 0.142    |
| i ~ empl_sick                     | 5.211                 | 0.490 | 4.252    | 6.171    |
| i ~ empl_student                  | -0.061                | 0.273 | -0.596   | 0.474    |
| i ~ empl_unemployed               | 1.432                 | 0.383 | 0.681    | 2.183    |
| i ~ FinancialUncertainty2019      | 1.754                 | 0.170 | 1.421    | 2.087    |
| i ~ FinancialHardship2019         | 2.765                 | 0.146 | 2.479    | 3.051    |
| i ~ IMD_1                         | -0.219                | 0.187 | -0.584   | 0.147    |
| i ~ IMD_2                         | 0.139                 | 0.163 | -0.180   | 0.458    |
| i ~ IMD_4                         | 0.049                 | 0.144 | -0.233   | 0.331    |
| i ~ IMD_5                         | 0.038                 | 0.138 | -0.232   | 0.309    |
| i ~ isced                         | 0.099                 | 0.137 | -0.168   | 0.367    |
| i ~ own_mortgage                  | -0.032                | 0.129 | -0.284   | 0.220    |
| i ~ own_rent                      | 0.555                 | 0.169 | 0.224    | 0.886    |
| i ~ save                          | -0.072                | 0.102 | -0.272   | 0.129    |
| i ~ sex_female                    | 1.006                 | 0.101 | 0.808    | 1.205    |
| i ~ single                        | 0.121                 | 0.140 | -0.153   | 0.395    |
| i ~ singleandchildren             | -0.186                | 0.316 | -0.804   | 0.433    |
| i ~~ i                            | 13.012                | 0.494 | 12.044   | 13.981   |
| i ~~ s                            | -0.823                | 0.177 | -1.169   | -0.476   |
| s ~ age                           | -0.001                | 0.002 | -0.005   | 0.002    |
| s ~ country_LondonandSouthEngland | -0.049                | 0.040 | -0.127   | 0.028    |
| s ~ coupleandchildren             | 0.098                 | 0.053 | -0.005   | 0.202    |
| s ~ empl_20_maternity             | -0.110                | 0.146 | -0.396   | 0.176    |
| s ~ empl_20_retired               | 0.071                 | 0.087 | -0.099   | 0.241    |
| s ~ empl_20_self                  | -0.097                | 0.128 | -0.348   | 0.155    |
| s ~ empl_20_sick                  | -1.050                | 0.224 | -1.489   | -0.612   |
| s ~ empl_20_student               | 0.003                 | 0.143 | -0.277   | 0.283    |
| s ~ empl_20_unemployed            | -0.299                | 0.144 | -0.582   | -0.017   |
| s ~ empl_21_maternity             | 0.192                 | 0.150 | -0.103   | 0.487    |
| s ~ empl_21_retired               | 0.011                 | 0.109 | -0.203   | 0.225    |
| s ~ empl_21_self                  | 0.277                 | 0.140 | 0.003    | 0.551    |
| s ~ empl_21_sick                  | -0.104                | 0.256 | -0.605   | 0.397    |
| s ~ empl_21_student               | 0.030                 | 0.191 | -0.345   | 0.405    |
| s ~ empl_21_unemployed            | -0.070                | 0.131 | -0.328   | 0.187    |
| s ~ empl_22_maternity             | 0.162                 | 0.194 | -0.217   | 0.542    |
| s ~ empl_22_retired               | -0.007                | 0.103 | -0.208   | 0.194    |
| s ~ empl_22_self                  | -0.113                | 0.127 | -0.362   | 0.136    |
| s ~ empl_22_sick                  | 1.065                 | 0.282 | 0.511    | 1.618    |
| s ~ empl_22_student               | 0.312                 | 0.194 | -0.067   | 0.692    |
| s ~ empl_22_unemployed            | 0.636                 | 0.153 | 0.336    | 0.935    |
| s ~ empl_maternity                | -0.242                | 0.145 | -0.526   | 0.043    |

|                                                         |        |       |        |        |  |  |  |  |  |  |  |  |  |  |  |  |  |  |  |
|---------------------------------------------------------|--------|-------|--------|--------|--|--|--|--|--|--|--|--|--|--|--|--|--|--|--|
| s ~ FinancialUncertainty2019                            | -0.306 | 0.065 | -0.434 | -0.179 |  |  |  |  |  |  |  |  |  |  |  |  |  |  |  |
| s ~ FinancialHardship2020to2022_Constant_uncertainty    | 0.798  | 0.101 | 0.599  | 0.996  |  |  |  |  |  |  |  |  |  |  |  |  |  |  |  |
| s ~ FinancialHardship2020to2022_b+3_uncertainty         | 0.361  | 0.054 | 0.256  | 0.467  |  |  |  |  |  |  |  |  |  |  |  |  |  |  |  |
| s ~ FinancialHardship2020to2022_b+1 and b+3_uncertainty | 0.506  | 0.096 | 0.317  | 0.694  |  |  |  |  |  |  |  |  |  |  |  |  |  |  |  |
| s ~ FinancialHardship2020to2022_b+1_uncertainty         | 0.236  | 0.080 | 0.079  | 0.393  |  |  |  |  |  |  |  |  |  |  |  |  |  |  |  |
| s ~ FinancialHardship2020to2022_b+1 and b+2_uncertainty | 0.519  | 0.131 | 0.263  | 0.775  |  |  |  |  |  |  |  |  |  |  |  |  |  |  |  |
| s ~ FinancialHardship2020to2022_b+2 and b+3_uncertainty | 0.663  | 0.102 | 0.464  | 0.862  |  |  |  |  |  |  |  |  |  |  |  |  |  |  |  |
| s ~ FinancialHardship2020to2022_b+2_uncertainty         | 0.447  | 0.088 | 0.274  | 0.620  |  |  |  |  |  |  |  |  |  |  |  |  |  |  |  |
| s ~ FinancialHardship2019                               | -0.616 | 0.066 | -0.745 | -0.487 |  |  |  |  |  |  |  |  |  |  |  |  |  |  |  |
| s ~ FinancialHardship2020to2022_Constant_hardship       | 0.692  | 0.077 | 0.542  | 0.842  |  |  |  |  |  |  |  |  |  |  |  |  |  |  |  |
| s ~ FinancialHardship2020to2022_b+3_hardship            | 0.587  | 0.089 | 0.412  | 0.761  |  |  |  |  |  |  |  |  |  |  |  |  |  |  |  |
| s ~ FinancialHardship2020to2022_b+1 and b+3_hardship    | 0.442  | 0.117 | 0.213  | 0.670  |  |  |  |  |  |  |  |  |  |  |  |  |  |  |  |
| s ~ FinancialHardship2020to2022_b+1_hardship            | 0.192  | 0.080 | 0.035  | 0.350  |  |  |  |  |  |  |  |  |  |  |  |  |  |  |  |
| s ~ FinancialHardship2020to2022_b+1 and b+2_hardship    | 0.192  | 0.099 | -0.002 | 0.386  |  |  |  |  |  |  |  |  |  |  |  |  |  |  |  |
| s ~ FinancialHardship2020to2022_b+2 and b+3_hardship    | 0.849  | 0.119 | 0.615  | 1.084  |  |  |  |  |  |  |  |  |  |  |  |  |  |  |  |
| s ~ FinancialHardship2020to2022_b+2_hardship            | 0.204  | 0.106 | -0.004 | 0.412  |  |  |  |  |  |  |  |  |  |  |  |  |  |  |  |
| s ~ IMD_1                                               | 0.090  | 0.070 | -0.047 | 0.226  |  |  |  |  |  |  |  |  |  |  |  |  |  |  |  |
| s ~ IMD_2                                               | 0.089  | 0.065 | -0.037 | 0.216  |  |  |  |  |  |  |  |  |  |  |  |  |  |  |  |
| s ~ IMD_4                                               | -0.017 | 0.055 | -0.125 | 0.092  |  |  |  |  |  |  |  |  |  |  |  |  |  |  |  |
| s ~ IMD_5                                               | -0.019 | 0.053 | -0.123 | 0.086  |  |  |  |  |  |  |  |  |  |  |  |  |  |  |  |
| s ~ isced                                               | 0.101  | 0.057 | -0.010 | 0.212  |  |  |  |  |  |  |  |  |  |  |  |  |  |  |  |
| s ~ own_mortgage                                        | -0.032 | 0.048 | -0.127 | 0.062  |  |  |  |  |  |  |  |  |  |  |  |  |  |  |  |
| s ~ own_rent                                            | -0.096 | 0.065 | -0.222 | 0.031  |  |  |  |  |  |  |  |  |  |  |  |  |  |  |  |
| s ~ save                                                | 0.102  | 0.039 | 0.025  | 0.179  |  |  |  |  |  |  |  |  |  |  |  |  |  |  |  |
| s ~ sex_female                                          | 0.108  | 0.038 | 0.033  | 0.183  |  |  |  |  |  |  |  |  |  |  |  |  |  |  |  |
| s ~ single                                              | -0.033 | 0.052 | -0.134 | 0.068  |  |  |  |  |  |  |  |  |  |  |  |  |  |  |  |
| s ~ singleandchildren                                   | -0.030 | 0.120 | -0.265 | 0.206  |  |  |  |  |  |  |  |  |  |  |  |  |  |  |  |
| s ~ s                                                   | 0.844  | 0.095 | 0.659  | 1.030  |  |  |  |  |  |  |  |  |  |  |  |  |  |  |  |

## Financial hardship and uncertainty (cross-sectional baseline and ipw for attrition)

| term                              | Employment adjustment |       |          |          |
|-----------------------------------|-----------------------|-------|----------|----------|
|                                   | Estimate              | SE    | CI lower | CI upper |
| ghq ~~ ghq                        | 11.804                | 0.634 | 10.561   | 13.047   |
| ghq_20 ~~ ghq_20                  | 14.946                | 0.513 | 13.940   | 15.951   |
| ghq_21 ~~ ghq_21                  | 14.703                | 0.431 | 13.858   | 15.549   |
| ghq_22 ~~ ghq_22                  | 11.710                | 0.573 | 10.586   | 12.833   |
| i ~ age                           | -0.036                | 0.005 | -0.047   | -0.025   |
| i ~ country_LondonandSouthEngland | 0.216                 | 0.120 | -0.019   | 0.452    |
| i ~ coupleandchildren             | -0.320                | 0.148 | -0.610   | -0.029   |
| i ~ empl_maternity                | 0.688                 | 0.410 | -0.116   | 1.491    |
| i ~ empl_retired                  | -0.156                | 0.160 | -0.471   | 0.158    |
| i ~ empl_self                     | -0.172                | 0.201 | -0.567   | 0.222    |
| i ~ empl_sick                     | 5.270                 | 0.530 | 4.230    | 6.309    |
| i ~ empl_student                  | -0.102                | 0.310 | -0.709   | 0.504    |
| i ~ empl_unemployed               | 1.358                 | 0.429 | 0.518    | 2.198    |
| i ~ FinancialUncertainty2019      | 1.677                 | 0.187 | 1.310    | 2.044    |
| i ~ FinancialHardship2019         | 2.835                 | 0.166 | 2.510    | 3.159    |
| i ~ IMD_1                         | -0.208                | 0.211 | -0.622   | 0.205    |
| i ~ IMD_2                         | 0.199                 | 0.186 | -0.166   | 0.563    |
| i ~ IMD_4                         | 0.003                 | 0.160 | -0.310   | 0.315    |
| i ~ IMD_5                         | 0.038                 | 0.151 | -0.257   | 0.334    |
| i ~ isced                         | 0.075                 | 0.146 | -0.211   | 0.361    |
| i ~ own_mortgage                  | -0.092                | 0.139 | -0.363   | 0.180    |
| i ~ own_rent                      | 0.591                 | 0.178 | 0.243    | 0.940    |
| i ~ save                          | -0.146                | 0.114 | -0.369   | 0.078    |
| i ~ sex_female                    | 1.058                 | 0.118 | 0.827    | 1.289    |
| i ~ single                        | 0.141                 | 0.157 | -0.167   | 0.450    |
| i ~ singleandchildren             | -0.244                | 0.354 | -0.937   | 0.449    |
| i ~~ i                            | 13.928                | 0.598 | 12.755   | 15.101   |
| i ~~ s                            | -0.908                | 0.228 | -1.355   | -0.461   |
| s ~ age                           | -0.002                | 0.002 | -0.006   | 0.002    |
| s ~ country_LondonandSouthEngland | -0.045                | 0.046 | -0.135   | 0.044    |
| s ~ coupleandchildren             | 0.106                 | 0.058 | -0.007   | 0.220    |
| s ~ empl_20_maternity             | -0.191                | 0.164 | -0.512   | 0.131    |
| s ~ empl_20_retired               | 0.045                 | 0.095 | -0.142   | 0.232    |
| s ~ empl_20_self                  | -0.122                | 0.145 | -0.406   | 0.162    |
| s ~ empl_20_sick                  | -1.063                | 0.244 | -1.541   | -0.585   |
| s ~ empl_20_student               | -0.045                | 0.145 | -0.330   | 0.240    |
| s ~ empl_20_unemployed            | -0.211                | 0.158 | -0.521   | 0.099    |
| s ~ empl_21_maternity             | 0.202                 | 0.167 | -0.125   | 0.529    |
| s ~ empl_21_retired               | 0.050                 | 0.128 | -0.201   | 0.300    |
| s ~ empl_21_self                  | 0.322                 | 0.153 | 0.022    | 0.623    |
| s ~ empl_21_sick                  | -0.035                | 0.290 | -0.604   | 0.533    |
| s ~ empl_21_student               | 0.023                 | 0.196 | -0.361   | 0.408    |
| s ~ empl_21_unemployed            | -0.037                | 0.141 | -0.313   | 0.240    |
| s ~ empl_22_maternity             | 0.195                 | 0.219 | -0.234   | 0.624    |
| s ~ empl_22_retired               | -0.003                | 0.114 | -0.226   | 0.220    |
| s ~ empl_22_self                  | -0.141                | 0.138 | -0.412   | 0.130    |
| s ~ empl_22_sick                  | 1.018                 | 0.332 | 0.367    | 1.668    |
| s ~ empl_22_student               | 0.253                 | 0.199 | -0.137   | 0.642    |
| s ~ empl_22_unemployed            | 0.575                 | 0.160 | 0.262    | 0.889    |
| s ~ empl_maternity                | -0.316                | 0.172 | -0.654   | 0.022    |
| s ~ FinancialUncertainty2019      | -0.284                | 0.073 | -0.426   | -0.141   |



|                                                         |        |       |        |        |  |  |  |  |  |  |  |  |  |  |  |  |  |  |  |
|---------------------------------------------------------|--------|-------|--------|--------|--|--|--|--|--|--|--|--|--|--|--|--|--|--|--|
| s ~ FinancialHardship2020to2022_Constant_uncertainty    | 0.856  | 0.112 | 0.636  | 1.075  |  |  |  |  |  |  |  |  |  |  |  |  |  |  |  |
| s ~ FinancialHardship2020to2022_b+3_uncertainty         | 0.380  | 0.059 | 0.264  | 0.495  |  |  |  |  |  |  |  |  |  |  |  |  |  |  |  |
| s ~ FinancialHardship2020to2022_b+1 and b+3_uncertainty | 0.538  | 0.104 | 0.333  | 0.742  |  |  |  |  |  |  |  |  |  |  |  |  |  |  |  |
| s ~ FinancialHardship2020to2022_b+1_uncertainty         | 0.265  | 0.092 | 0.084  | 0.446  |  |  |  |  |  |  |  |  |  |  |  |  |  |  |  |
| s ~ FinancialHardship2020to2022_b+1 and b+2_uncertainty | 0.622  | 0.147 | 0.335  | 0.910  |  |  |  |  |  |  |  |  |  |  |  |  |  |  |  |
| s ~ FinancialHardship2020to2022_b+2 and b+3_uncertainty | 0.669  | 0.114 | 0.445  | 0.892  |  |  |  |  |  |  |  |  |  |  |  |  |  |  |  |
| s ~ FinancialHardship2020to2022_b+2_uncertainty         | 0.415  | 0.107 | 0.206  | 0.623  |  |  |  |  |  |  |  |  |  |  |  |  |  |  |  |
| s ~ FinancialHardship2019                               | -0.632 | 0.073 | -0.775 | -0.489 |  |  |  |  |  |  |  |  |  |  |  |  |  |  |  |
| s ~ FinancialHardship2020to2022_Constant_hardship       | 0.702  | 0.083 | 0.540  | 0.864  |  |  |  |  |  |  |  |  |  |  |  |  |  |  |  |
| s ~ FinancialHardship2020to2022_b+3_hardship            | 0.631  | 0.097 | 0.441  | 0.821  |  |  |  |  |  |  |  |  |  |  |  |  |  |  |  |
| s ~ FinancialHardship2020to2022_b+1 and b+3_hardship    | 0.435  | 0.126 | 0.187  | 0.683  |  |  |  |  |  |  |  |  |  |  |  |  |  |  |  |
| s ~ FinancialHardship2020to2022_b+1_hardship            | 0.219  | 0.088 | 0.047  | 0.391  |  |  |  |  |  |  |  |  |  |  |  |  |  |  |  |
| s ~ FinancialHardship2020to2022_b+1 and b+2_hardship    | 0.212  | 0.111 | -0.006 | 0.431  |  |  |  |  |  |  |  |  |  |  |  |  |  |  |  |
| s ~ FinancialHardship2020to2022_b+2 and b+3_hardship    | 0.905  | 0.127 | 0.657  | 1.153  |  |  |  |  |  |  |  |  |  |  |  |  |  |  |  |
| s ~ FinancialHardship2020to2022_b+2_hardship            | 0.183  | 0.113 | -0.039 | 0.405  |  |  |  |  |  |  |  |  |  |  |  |  |  |  |  |
| s ~ IMD_1                                               | 0.108  | 0.076 | -0.041 | 0.257  |  |  |  |  |  |  |  |  |  |  |  |  |  |  |  |
| s ~ IMD_2                                               | 0.091  | 0.073 | -0.053 | 0.234  |  |  |  |  |  |  |  |  |  |  |  |  |  |  |  |
| s ~ IMD_4                                               | -0.010 | 0.061 | -0.129 | 0.109  |  |  |  |  |  |  |  |  |  |  |  |  |  |  |  |
| s ~ IMD_5                                               | -0.008 | 0.057 | -0.121 | 0.104  |  |  |  |  |  |  |  |  |  |  |  |  |  |  |  |
| s ~ isced                                               | 0.116  | 0.062 | -0.005 | 0.238  |  |  |  |  |  |  |  |  |  |  |  |  |  |  |  |
| s ~ own_mortgage                                        | -0.024 | 0.051 | -0.124 | 0.076  |  |  |  |  |  |  |  |  |  |  |  |  |  |  |  |
| s ~ own_rent                                            | -0.119 | 0.068 | -0.252 | 0.014  |  |  |  |  |  |  |  |  |  |  |  |  |  |  |  |
| s ~ save                                                | 0.134  | 0.043 | 0.050  | 0.218  |  |  |  |  |  |  |  |  |  |  |  |  |  |  |  |
| s ~ sex_female                                          | 0.123  | 0.044 | 0.036  | 0.209  |  |  |  |  |  |  |  |  |  |  |  |  |  |  |  |
| s ~ single                                              | -0.053 | 0.057 | -0.165 | 0.060  |  |  |  |  |  |  |  |  |  |  |  |  |  |  |  |
| s ~ singleandchildren                                   | -0.016 | 0.129 | -0.269 | 0.238  |  |  |  |  |  |  |  |  |  |  |  |  |  |  |  |
| s ~ s                                                   | 0.858  | 0.120 | 0.623  | 1.093  |  |  |  |  |  |  |  |  |  |  |  |  |  |  |  |
|                                                         |        |       |        |        |  |  |  |  |  |  |  |  |  |  |  |  |  |  |  |
|                                                         |        |       |        |        |  |  |  |  |  |  |  |  |  |  |  |  |  |  |  |
